# Supplementary material for: 2-Difluoromethylpyridine as a bioisosteric replacement of pyridine-N-oxide: the case of quorum sensing inhibitors
Source: Royal Society of Chemistry journal article supplement (doi:10.1039/d1md00245g), 2021-01-01

## **SUPPORTING INFORMATION**

**For**

### **2-Difluoromethylpyridine as a bioisosteric replacement of pyridine-*N*-oxide: *the case of quorum sensing inhibitors.***

Truong Thanh Tung,<sup>1,2\*</sup> Thang Nguyen Quoc<sup>3</sup>

<sup>1</sup>*Faculty of Pharmacy, PHENIKAA University, Hanoi 12116, Vietnam*

<sup>2</sup>*PHENIKAA Institute for Advanced Study (PIAS), PHENIKAA University, Hanoi 12116, Vietnam*

<sup>3</sup>*Nuclear Medicine Unit, Vinmec Healthcare System, Hanoi, Vietnam*

*\*Corresponding author*

Email: [tung.truongthanh@phenikaa-uni.edu.vn](mailto:tung.truongthanh@phenikaa-uni.edu.vn)

ORCID: 0000-0002-5263-203X

[tunglab.com](http://tunglab.com)

## I. Materials and methods

### **Chemistry**

All reagents and solvents used in this work were purchased from commercially available vendors including Sigma, Merck, TCI. Compounds were characterized using NMR technique including:  $^1\text{H}$ -NMR (recorded at 400 or 500 MHz Bruker Avance, 300k),  $^{13}\text{C}$ -NMR (recorded at 151 or 101 MHz). Chemical shifts ( $\delta$ ) are reported in ppm.  $J$  values are reported in Hertz. Pre-coated Silica gel 60 F<sub>254</sub> plates were used for TLC and visualized under UV light. The compounds had at least 95% purity before biological screening. The electrospray (ESI) mass spectrometer system was used for record HRMS.

### **Biology**

*Quorum sensing assay.* The method has been reported previously [1] without modification. Briefly, the QS reporter strain *lasB-gfp* of *P. aeruginosa* was used. The growth was monitored using Victor X4 multilabel plate reader. The GFP expression was recorded as fluorescence at 485 nm, 535 nm.

*Anti-violacein formation of CviR receptor.* The method has been reported previously [1] without modification. Briefly, the *C. violaceum* 31532 was used. The absorbance was recorded at 585nm.

*Anti-biofilm biomass.* The method has been reported previously [1] without modification. Briefly, we use *P. aeruginosa* PA14 for the assay. Negative control is DMSO.

*The protease assays.* The assay was performed using the previously described method [2]. Briefly, growth phase of *P. aeruginosa* was diluted to  $\text{OD}_{600} = 0.1$  in PTSB medium and incubated for 8h at 37 °C. The bacterial culture and testing compounds were added to each well of a 96 well-plate and cultured for 24h at 37 °C. The absorbance was recorded using Spectramax M4 (Molecular Devices, USA) at 440 nm. Data was calculated subtracting OD440 recorded with the final OD600 values.

## I. General procedure for synthesis of library compounds.

A mixture of corresponding pyridine (1 equiv),  $K_2S_2O_8$  (2.5 equiv.),  $AgNO_3$  (0.2 equiv.) and acetonitrile was added to a 25 ml RBF. Difluoromethylating  $CF_2HCOOH$  (2.5 equiv) was added, followed  $H_2O$  (1:1 to acetonitrile) and 1% trifluoroacetic acid. The mixture was stirred at 50 °C for 24h and monitored by TLC until completion. Then water (2 vol. equiv) then  $NaHCO_3$  (saturated) was added and extracted with ethyl acetate (4 times). The organic layer was washed with brine, dried with anhydrous  $Na_2SO_4(s)$  and concentrated. The residue was purified by silica-gel flash column chromatography (eluent: EA/Hex = 1:3) to provide the title compound.

**(4-Chlorophenyl)(2-(difluoromethyl)pyridin-4-yl)methanone (1).** yield 68 %, 53 mg from (4-chlorophenyl)(pyridin-4-yl)methanone; Colorless oil;  $^1H$  NMR (600 MHz,  $CDCl_3$ )  $\delta$  8.79 (d,  $J$  = 4.8 Hz, 1H), 7.82 (s, 1H), 7.71 (d,  $J$  = 7.3 Hz, 2H), 7.61 (m, 1H), 7.45 (d,  $J$  = 7.3 Hz, 2H), 6.65 (t,  $J$  = 55.2 Hz, 1H);  $^{13}C$  NMR (151 MHz,  $CDCl_3$ )  $\delta$  192.9, 153.9 (t,  $J_{C-F}$  = 27.2 Hz), 150.3, 145.6, 140.6, 133.9, 131.5, 129.3, 124.5, 119.3 (t,  $J_{C-F}$  = 4.2 Hz), 113.5 (t,  $J_{C-F}$  = 241.6 Hz); LRMS(ESI)  $m/z$   $[M+H]^+$  found 268.0; HRMS (ESI)  $m/z$   $[M+H]$  calculated for  $C_{13}H_9ClF_2NO$  268.0341, found 268.0342.

**4-(4-Chlorobenzyl)-2-(difluoromethyl)pyridine (2).** 63 %, 48 mg from 4-(4-chlorobenzyl)pyridine; Yellow oil;  $^1H$  NMR (600 MHz,  $CDCl_3$ )  $\delta$  8.48 (s, 1H), 7.37 (s, 1H), 7.24 (d,  $J$  = 7.8 Hz, 2H), 7.19 (s, 1H), 7.04 (d,  $J$  = 8.4 Hz, 2H), 6.54 (t,  $J$  = 55.8 Hz, 1H), 3.94 (s, 2H);  $^{13}C$  NMR (151 MHz,  $CDCl_3$ )  $\delta$  153.3 (t,  $J_{C-F}$  = 24.2 Hz), 151.3, 150.0, 136.6, 132.9, 130.4, 129.1, 125.8, 120.5, 114.2 (t,  $J_{C-F}$  = 241.6 Hz), 40.7; LRMS(ESI)  $m/z$   $[M+H]$  found 254.0; HRMS (ESI)  $m/z$   $[M+H]$  calculated for  $C_{13}H_{11}ClF_2N^+$  254.0548, found 254.0548.

**2-(Difluoromethyl)-4-phenoxy pyridine (3).** 62 %, 63 mg from 4-phenoxy pyridine; Yellow oil;  $^1H$  NMR (600 MHz,  $CDCl_3$ )  $\delta$  8.59 (br, 1H), 7.57 (m, 2H), 7.41 (td,  $J$  = 7.3, 3.3 Hz, 1H), 7.36 (d,  $J$  = 3.6 Hz, 1H, H5), 7.22 (d,  $J$  = 4.3 Hz, 2H), 7.00 (s, 1H), 6.69 (t,  $J$  = 54.3 Hz, 2H);  $^{13}C$  NMR (151 MHz,  $CDCl_3$ )  $\delta$  166.0, 155.1 (t,  $J_{C-F}$  = 26.0 Hz), 153.6, 151.2, 130.4, 125.9, 120.9, 113.6 (t,  $J_{C-F}$  = 241.2 Hz), 113.5, 108.6; LRMS(ESI)  $m/z$   $[M+H]$  found 222.1; HRMS (ESI)  $m/z$   $[M+H]$  calculated for  $C_{12}H_{10}F_2NO$  222.0730, found 222.0732.

**2-(Difluoromethyl)-4-phenylpyridine (4).** 59 %, 68 mg from phenylpyridine; Colorless oil;  $^1H$  NMR (600 MHz,  $CDCl_3$ )  $\delta$  8.72 (s, 1H), 7.88 (s, 1H), 7.69 (br, 2H), 7.64 (d,  $J$  = 5.0 Hz, 1H), 7.52 (br, 3H), 6.72 (t,  $J$  = 55.5 Hz, 1H);  $^{13}C$  NMR (151 MHz,  $CDCl_3$ )  $\delta$  153.7 (t,  $J_{C-F}$  = 242.4

Hz), 150.0, 137.4, 129.6, 129.3, 127.1, 123.3, 118.1 (t,  $J_{C-F}$  = 3.0 Hz), 114.1 (t,  $J_{C-F}$  = 240.6 Hz); LRMS(ESI) m/z  $[M+H]^+$  found 206.1; HRMS (ESI) m/z  $[M+H]$  calculated for  $C_{12}H_{10}F_2N$  206.0781, found 206.0781.

**2-(Difluoromethyl)isonicotinonitrile (5).** 64 %, 61 mg from pyridine-4-carbothioamide; Yellow oil;  $^1H$  NMR (600 MHz,  $CDCl_3$ )  $\delta$  8.80 (d,  $J$  = 4.8 Hz, 1H), 7.81 (s, 1H), 7.60 (d,  $J$  = 4.8 Hz, 1H), 6.61 (t,  $J$  = 55.2 Hz, 1H);  $^{13}C$  NMR (151 MHz,  $CDCl_3$ )  $\delta$  154.6 (t,  $J_{C-F}$  = 25.7 Hz), 150.6, 127.0, 122.11 (t,  $J_{C-F}$  = 3.0 Hz), 122.0, 115.7, 112.8 (t,  $J_{C-F}$  = 243.1 Hz, C-7); LRMS(ESI) m/z  $[M+H]$  found 155.0; HRMS (ESI) m/z  $[M+H]$ , calculated for  $C_7H_5F_2N_2$  155.0421, found 155.0422.

**Methyl 2-(difluoromethyl)isonicotinate (6).** 70 %, 72 mg from methyl isonicotinate; Colorless oil;  $^1H$  NMR (400 MHz,  $CDCl_3$ )  $\delta$  8.75 (d,  $J$  = 7.8 Hz, 1H), 8.11 (s, 1H), 7.90 (d,  $J$  = 7.2 Hz, 1H), 6.63 (t,  $J$  = 55.2 Hz, 1H), 3.92 (s, 3H);  $^{13}C$  NMR (101 MHz,  $CDCl_3$ )  $\delta$  164.7, 154.2 (t,  $J_{C-F}$  = 26.3 Hz), 150.4, 138.9, 124.7, 119.7 (t,  $J_{C-F}$  = 4.0 Hz), 113.4 (t,  $J_{C-F}$  = 242.4 Hz), 52.9; LRMS(ESI) m/z  $[M+H]$  found 188.0; HRMS (ESI) m/z  $[M+H]$  calculated for  $C_8H_8F_2NO_2^+$  188.0523, found 188.0522.

**Methyl 3-(difluoromethyl)isonicotinate (7),** using the general procedure but no TFA added, isolated as by-product of **6**. 27 %, yellow oil, 16 mg from methyl isonicotinate;  $^1H$  NMR (400 MHz,  $CDCl_3$ )  $\delta$  9.11 (s, 1H), 8.90 (s, 1H), 7.85 (s, 1H), 7.51 (t,  $J$  = 54.8, 1H), 4.00 (s, 3H);  $^{13}C$  NMR (101 MHz,  $CDCl_3$ )  $\delta$  164.9, 152.4, 148.0, 136.0 (t,  $J$  = 19 Hz), 128.7 (t,  $J$  = 22.0), 123.3, 111.4 (t,  $J$  = 238.8 Hz), 53.1; LRMS(ESI) m/z  $[M+H]^+$  found 188.0; HRMS (ESI) m/z  $[M+H]^+$  calculated for  $C_8H_8F_2NO_2^+$  188.0523, found 188.0523.

## References

- [1] Truong T. Tung, Thang N. Quoc, Discovery of novel  $\beta$ -turn mimetic-based peptides as novel quorum sensing inhibitors of gram-negative bacteria, *Bioorganic & Medicinal Chemistry Letters*, **2021**, 46, 128170
- [2] P.J. Petersen, P. Labthavikul, C.H. Jones, P.A. Bradford, J. Antimicrob. Chemother. 2006, 57, 573-576.

## II. Attempt to synthesis the 2-(difluoromethyl)-4-nitropyridine

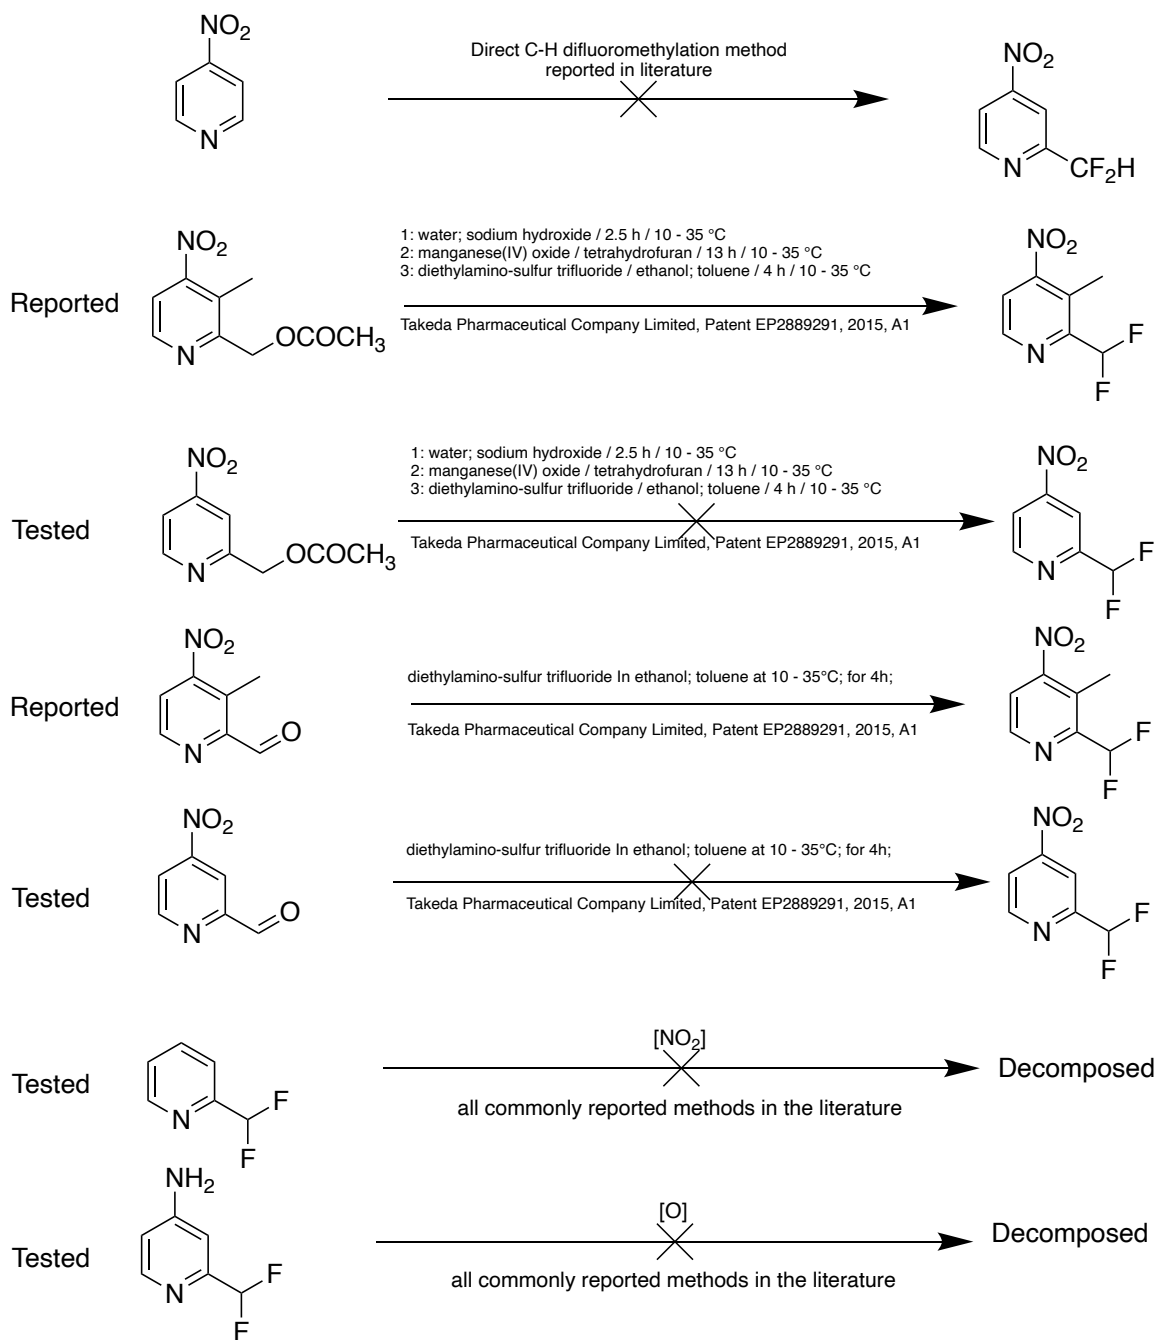

**Scheme S1.** Attempt to synthesis the 2-(difluoromethyl)-4-nitropyridine

#### Direct methods:

- [3] Truong T. Tung, Søren B. Christensen, John Nielsen, Difluoroacetic Acid as a New Reagent for Direct C–H Difluoromethylation of Heteroaromatic Compounds, *Chem. Eur. J.* **2017**, 23, 18125-18128.

- [4] Yuta Fujiwara, Janice A Dixon, Rodrigo A Rodriguez, Ryan D Baxter, Darryl D Dixon, Michael R Collins, Donna G Blackmond, Phil S Baran, A New Reagent for Direct Difluoromethylation, *J. Am. Chem. Soc.* **2012**, 134(3), 1494–1497.
- [5] Sheng-Qing Zhu, Yin-Li Liu, Huan Li, Xiu-Hua Xu, Feng-Ling Qing, Direct and Regioselective C–H Oxidative Difluoromethylation of Heteroarenes, *J. Am. Chem. Soc.* **2018**, 140, 37, 11613–11617.
- [6] Claudio F Meyer, Sandrine M Hell, Antonio Misale, Andrés A Trabanco, Véronique Gouverneur, Hydrodifluoromethylation of Alkenes with Difluoroacetic Acid, *Angew Chem Int Ed Engl* . **2019**, 58(26), 8829-8833.
- [7] Alexandra C Sun, Edward J McClain, Joel W Beatty, Corey R J Stephenson, *Organic Letters* **2018**, 20, 3487 – 3490.

**Indirect method:**

- [8] Takeda Pharmaceutical Company Limited, Patent EP2889291, 2015, A1

### III. Copy of NMR-spectra and chromatographic analysis

Compound 1

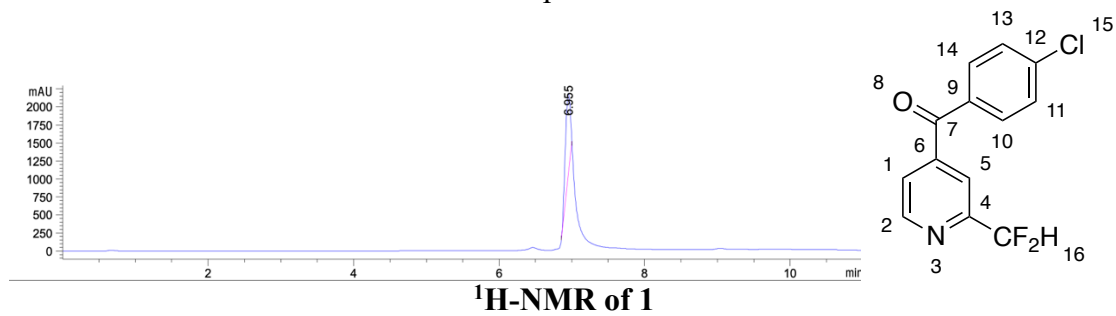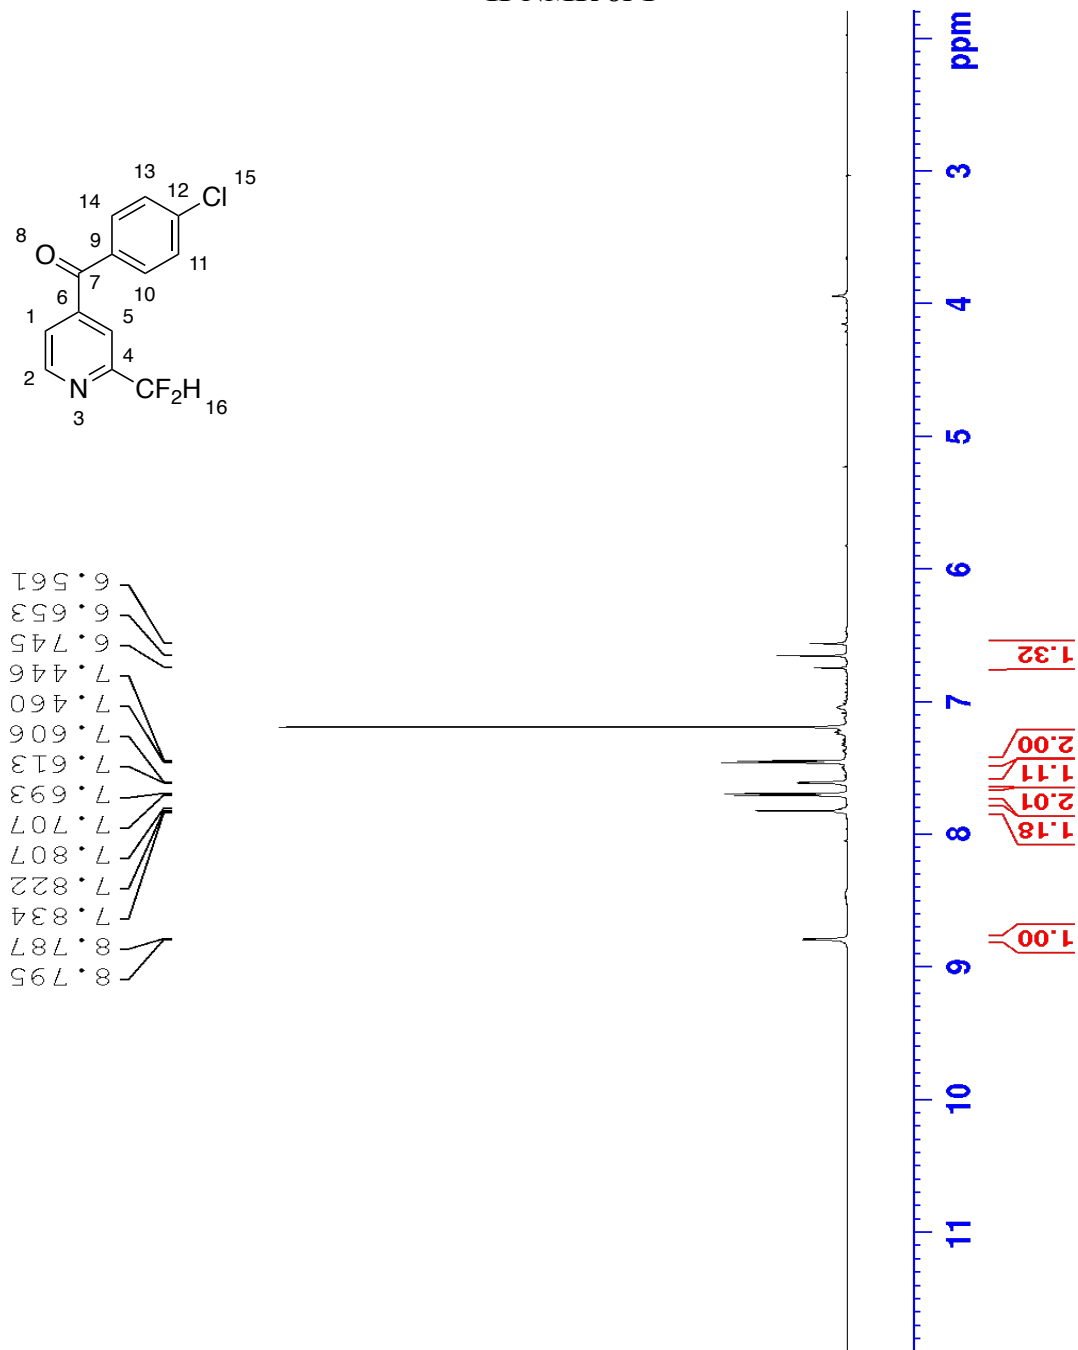

<sup>13</sup>C-NMR of 1

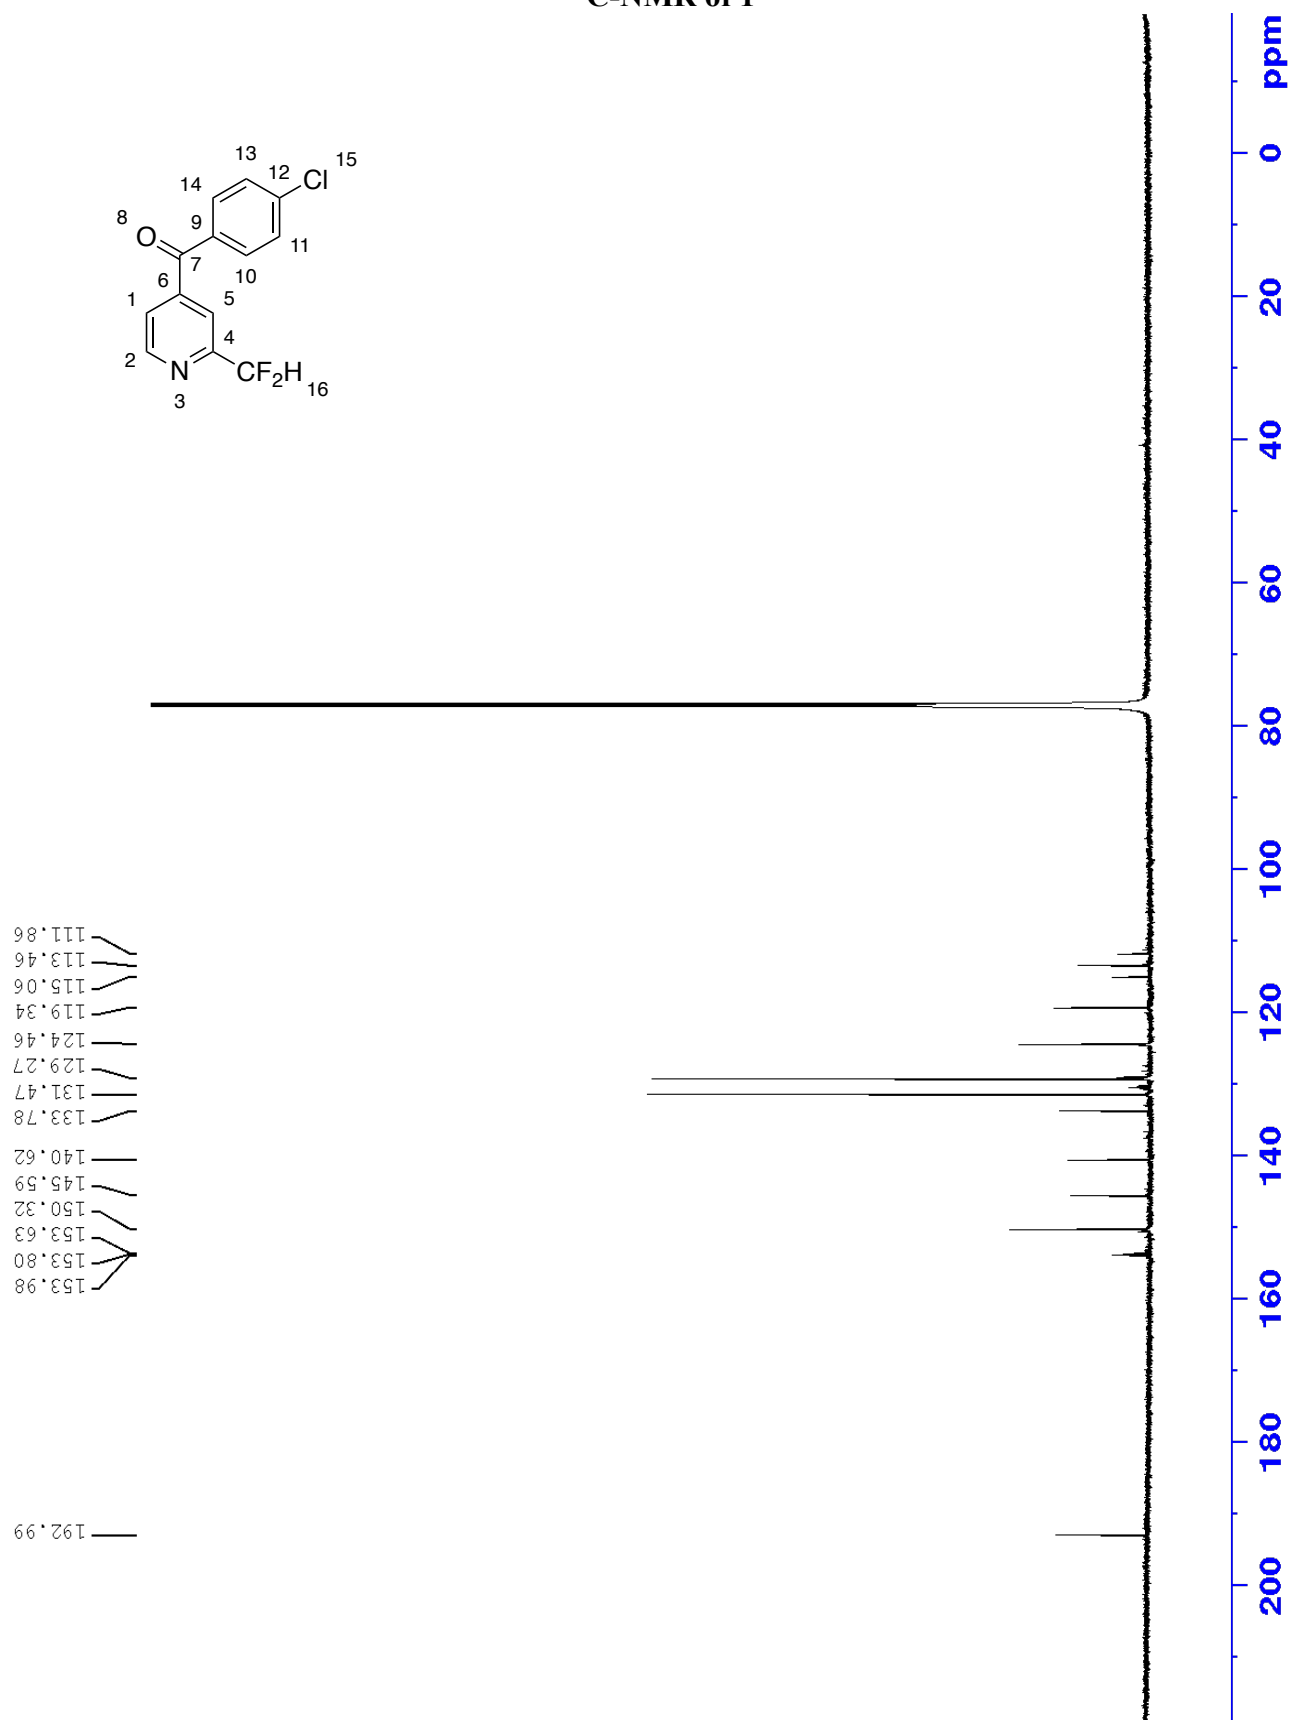



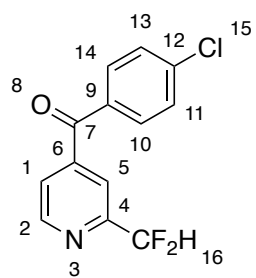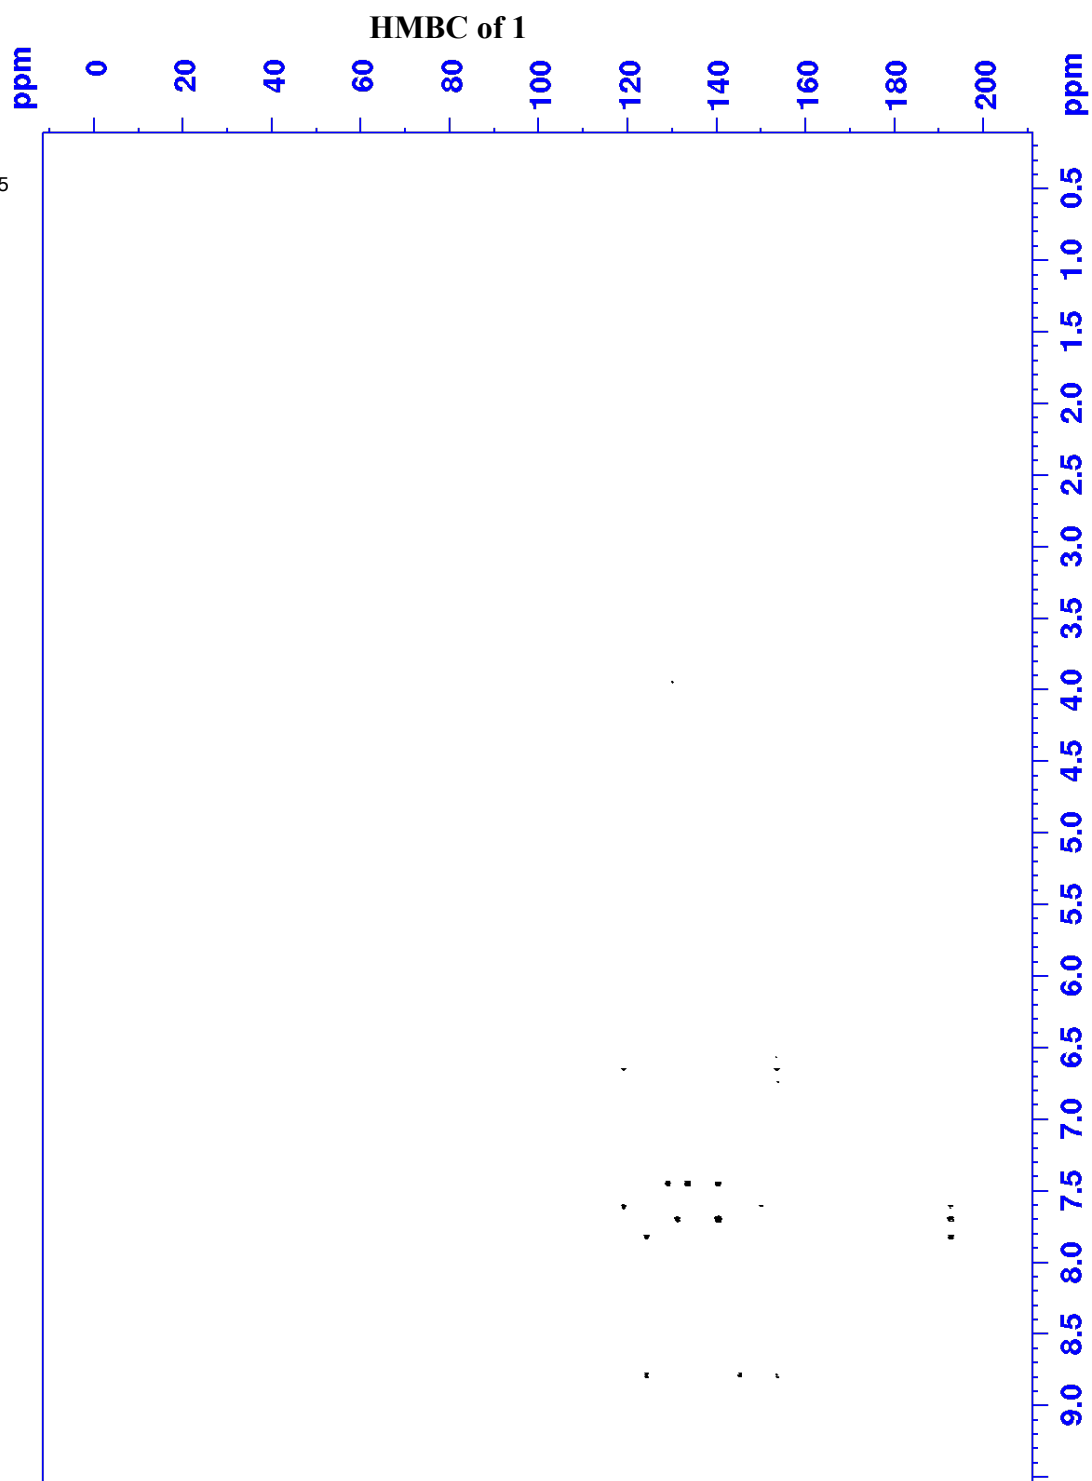

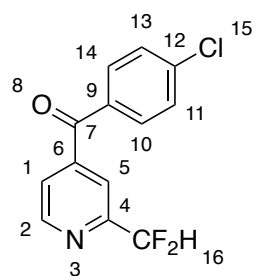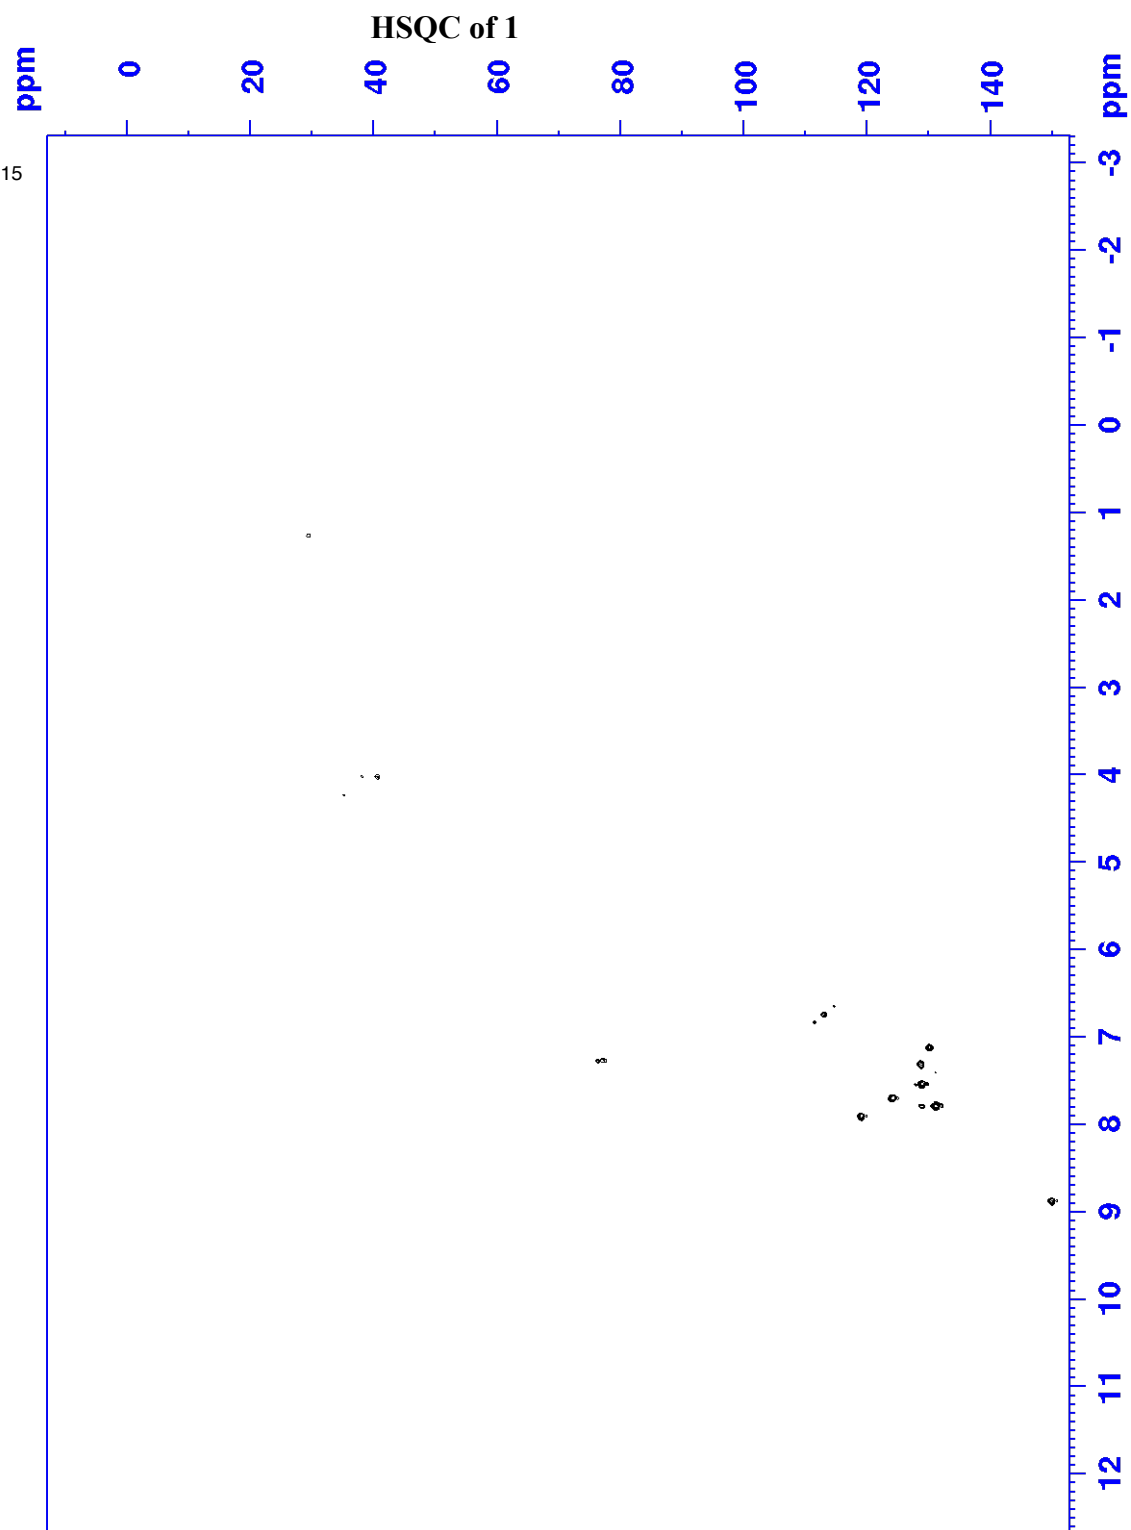

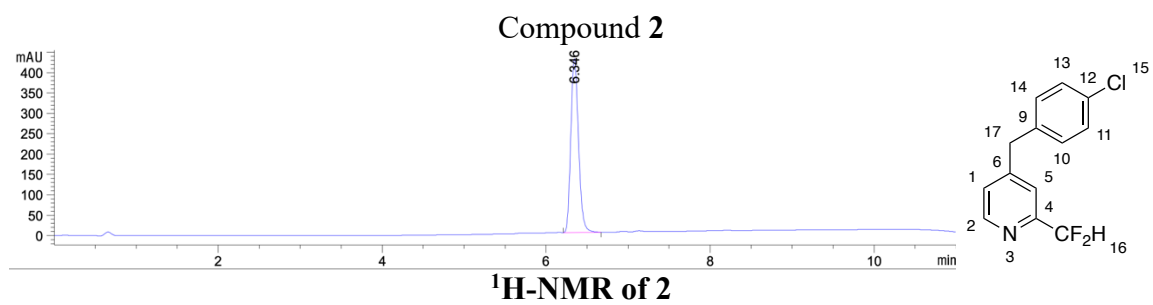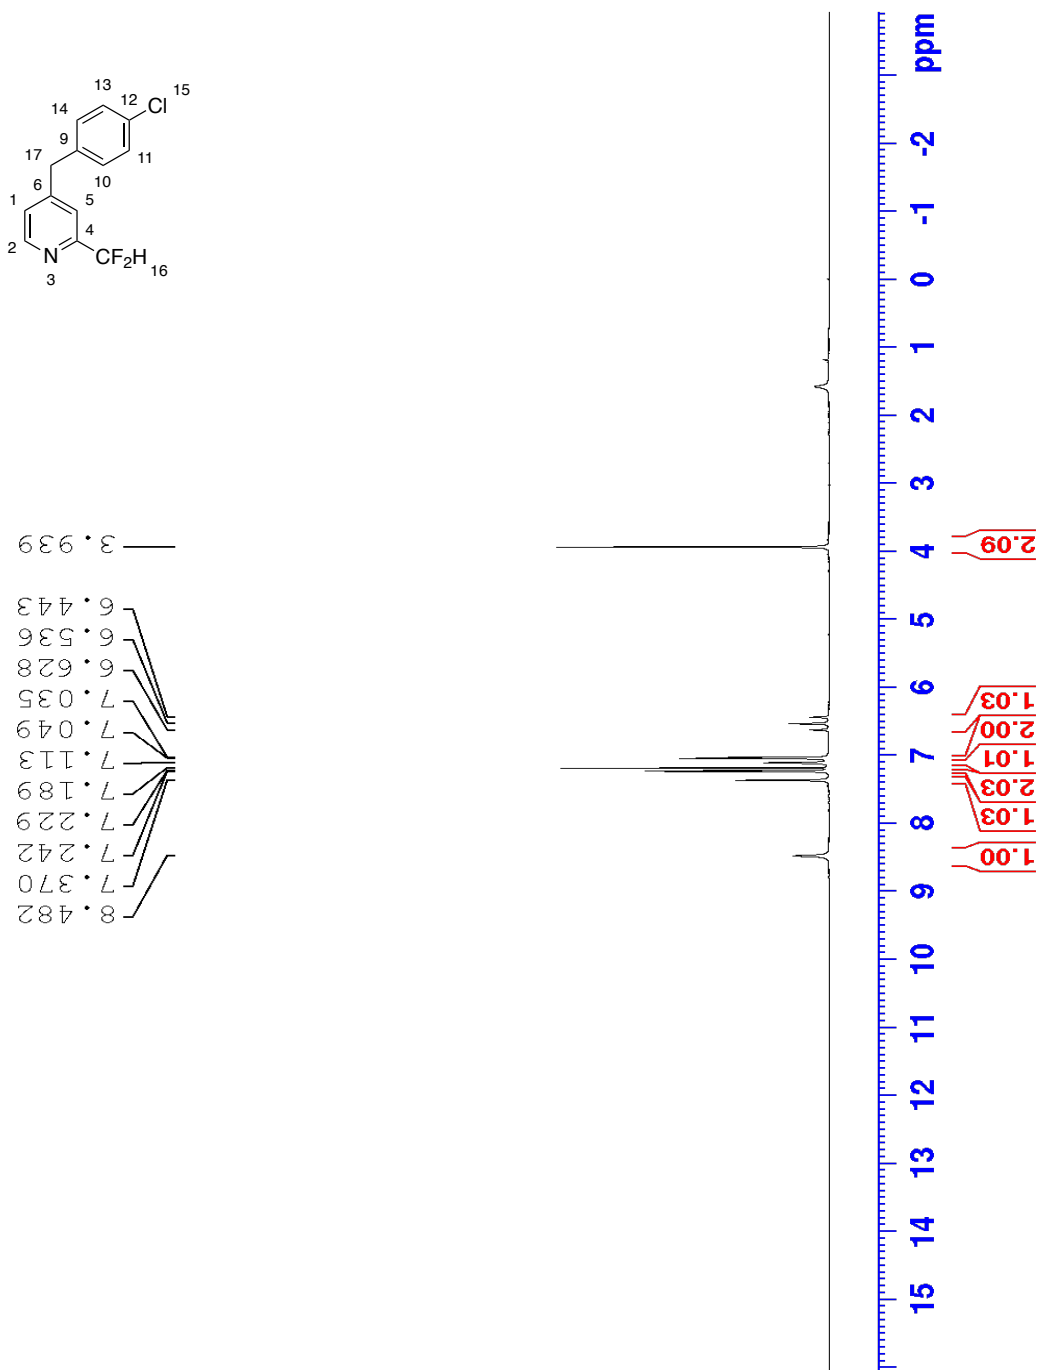

# <sup>13</sup>C-NMR of 2

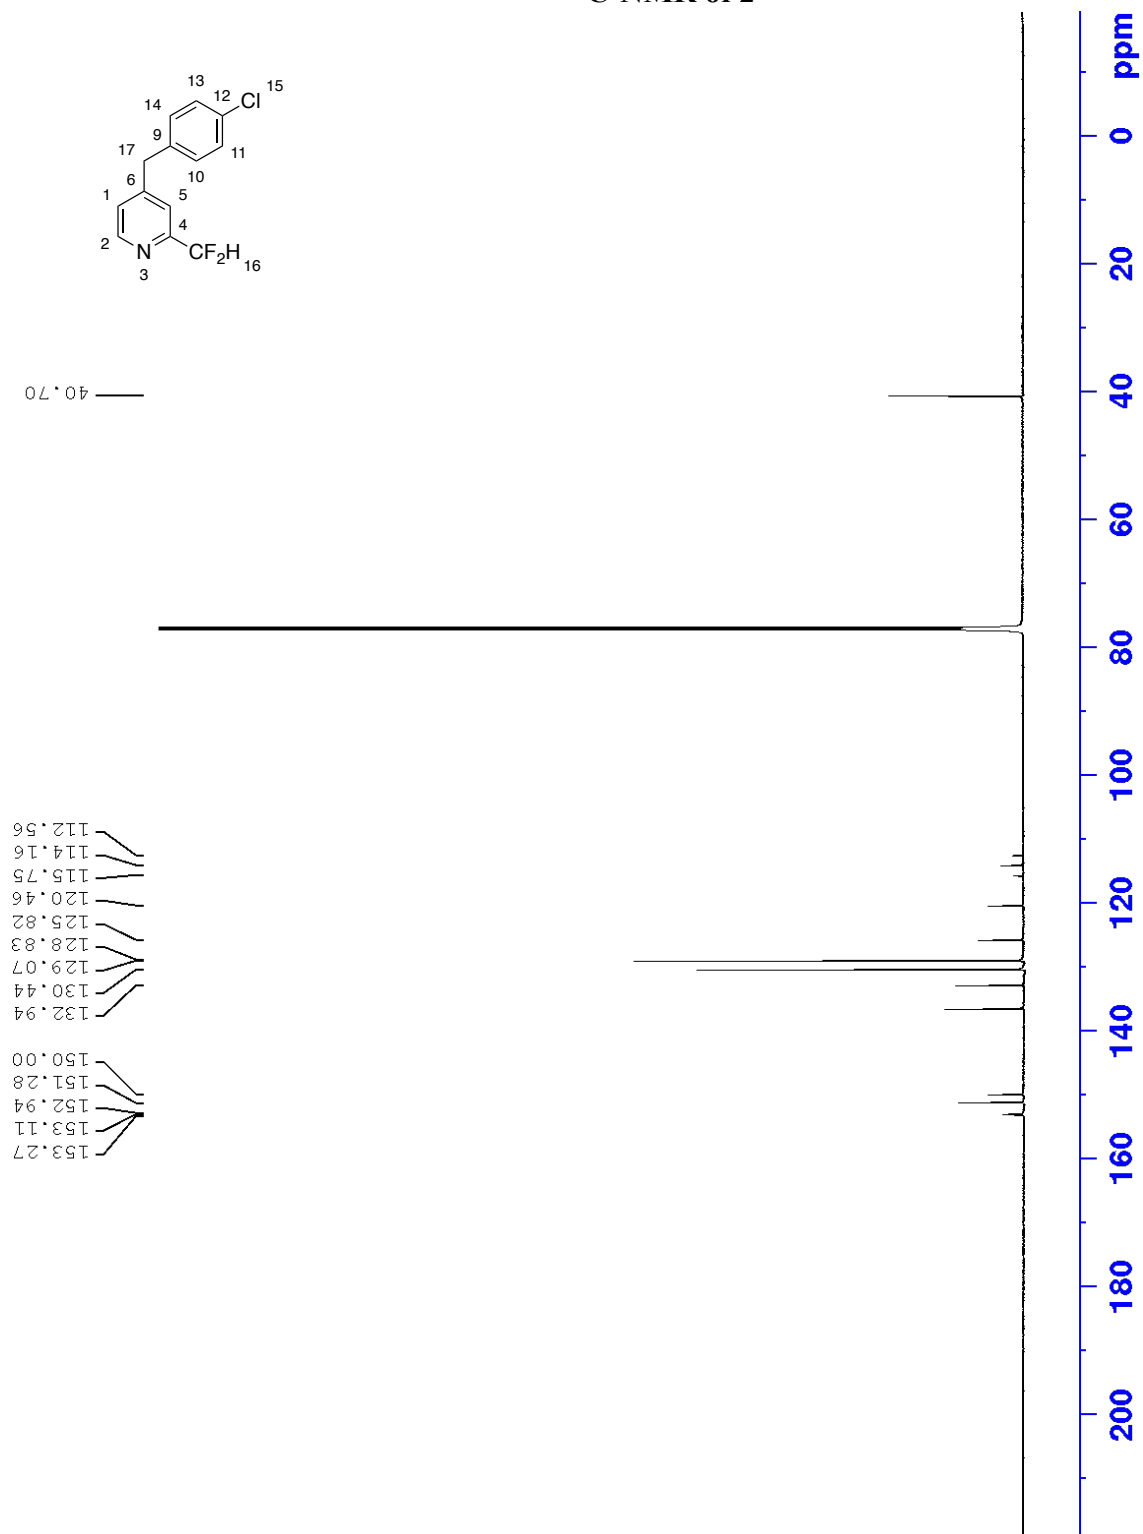

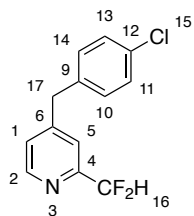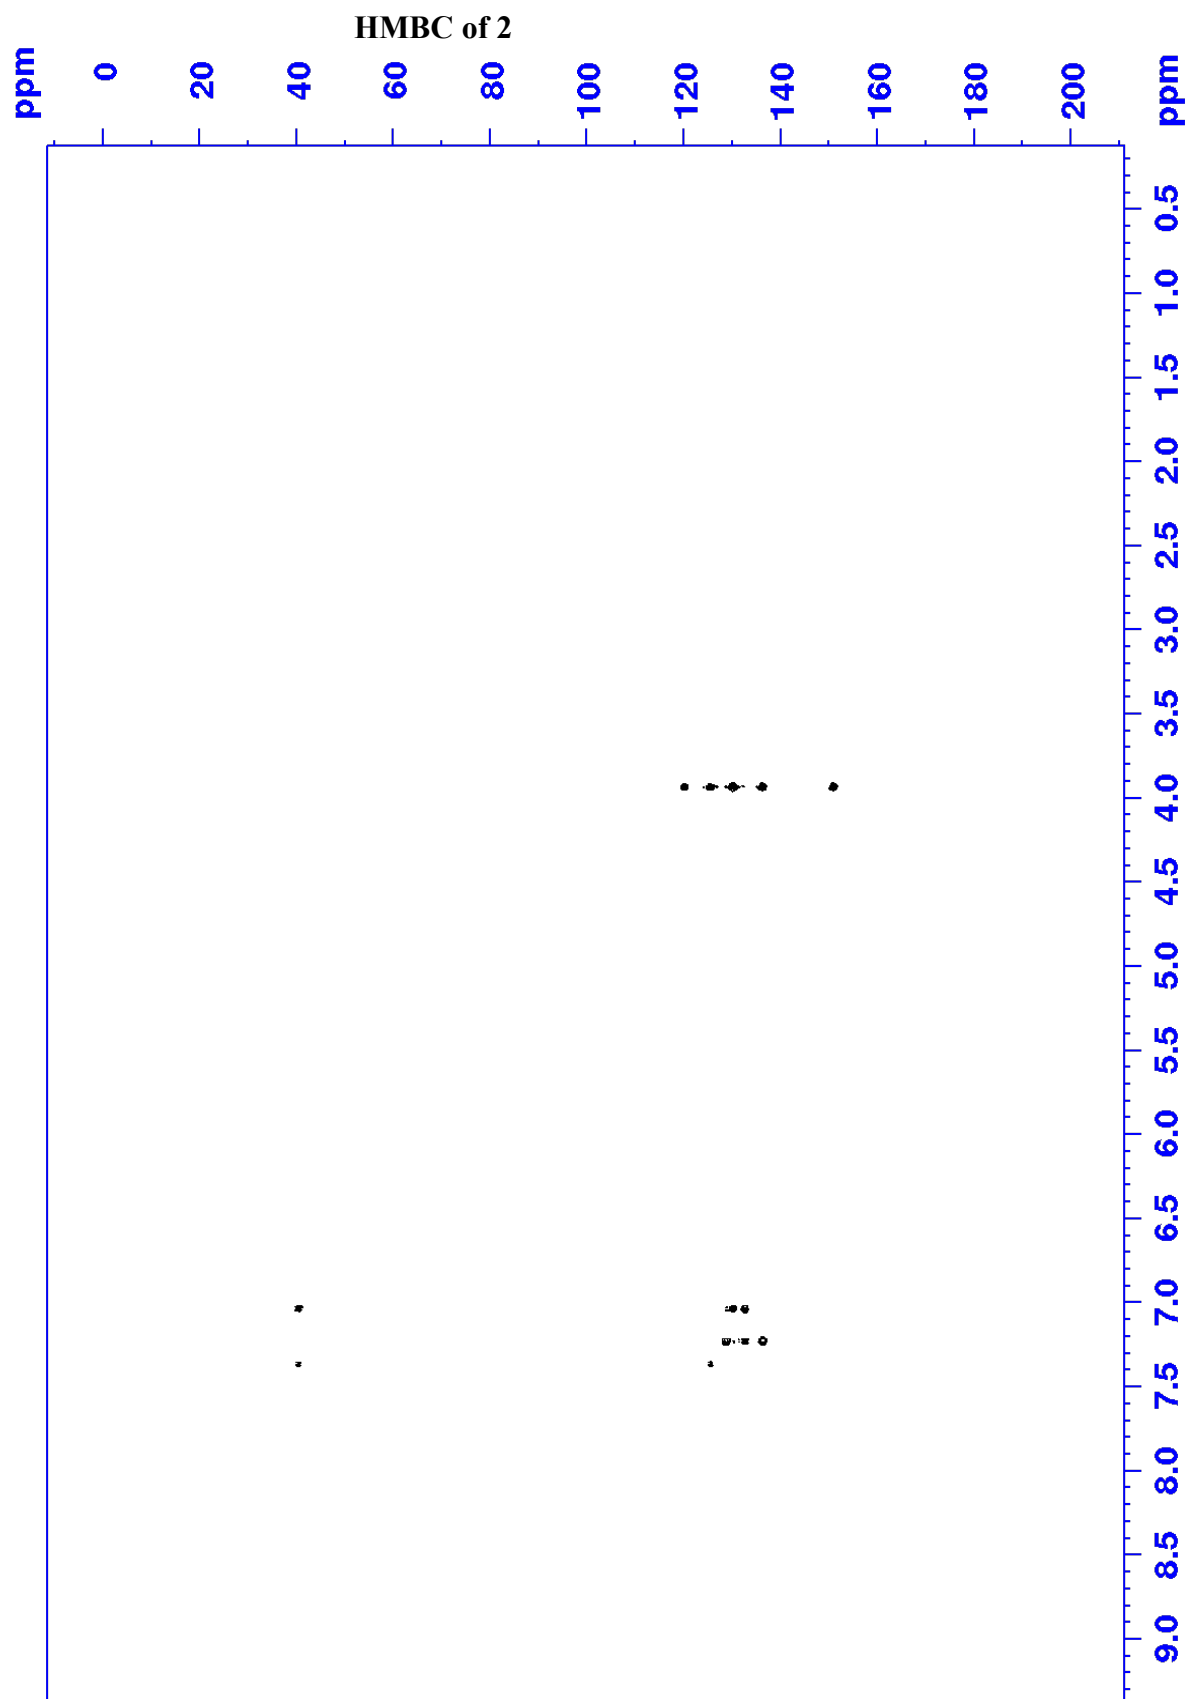

# Compound 3

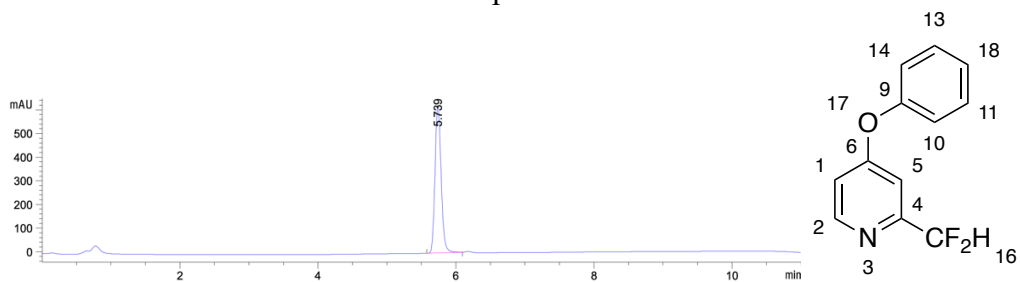

## <sup>1</sup>H-NMR of 3

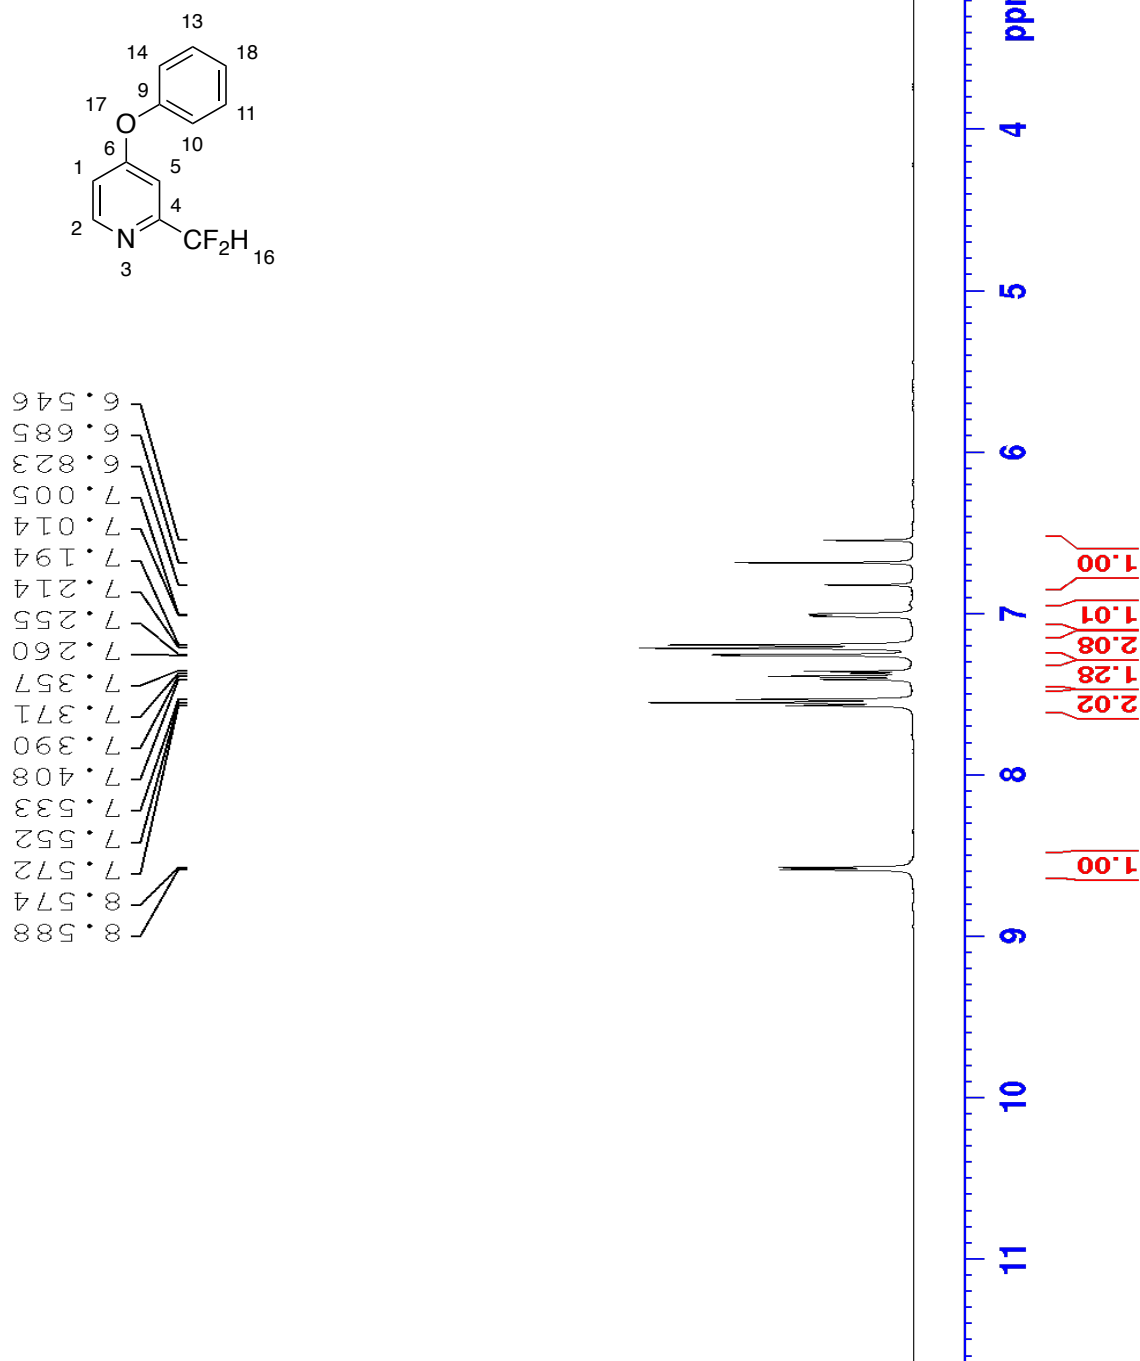

<sup>13</sup>C-NMR of 3

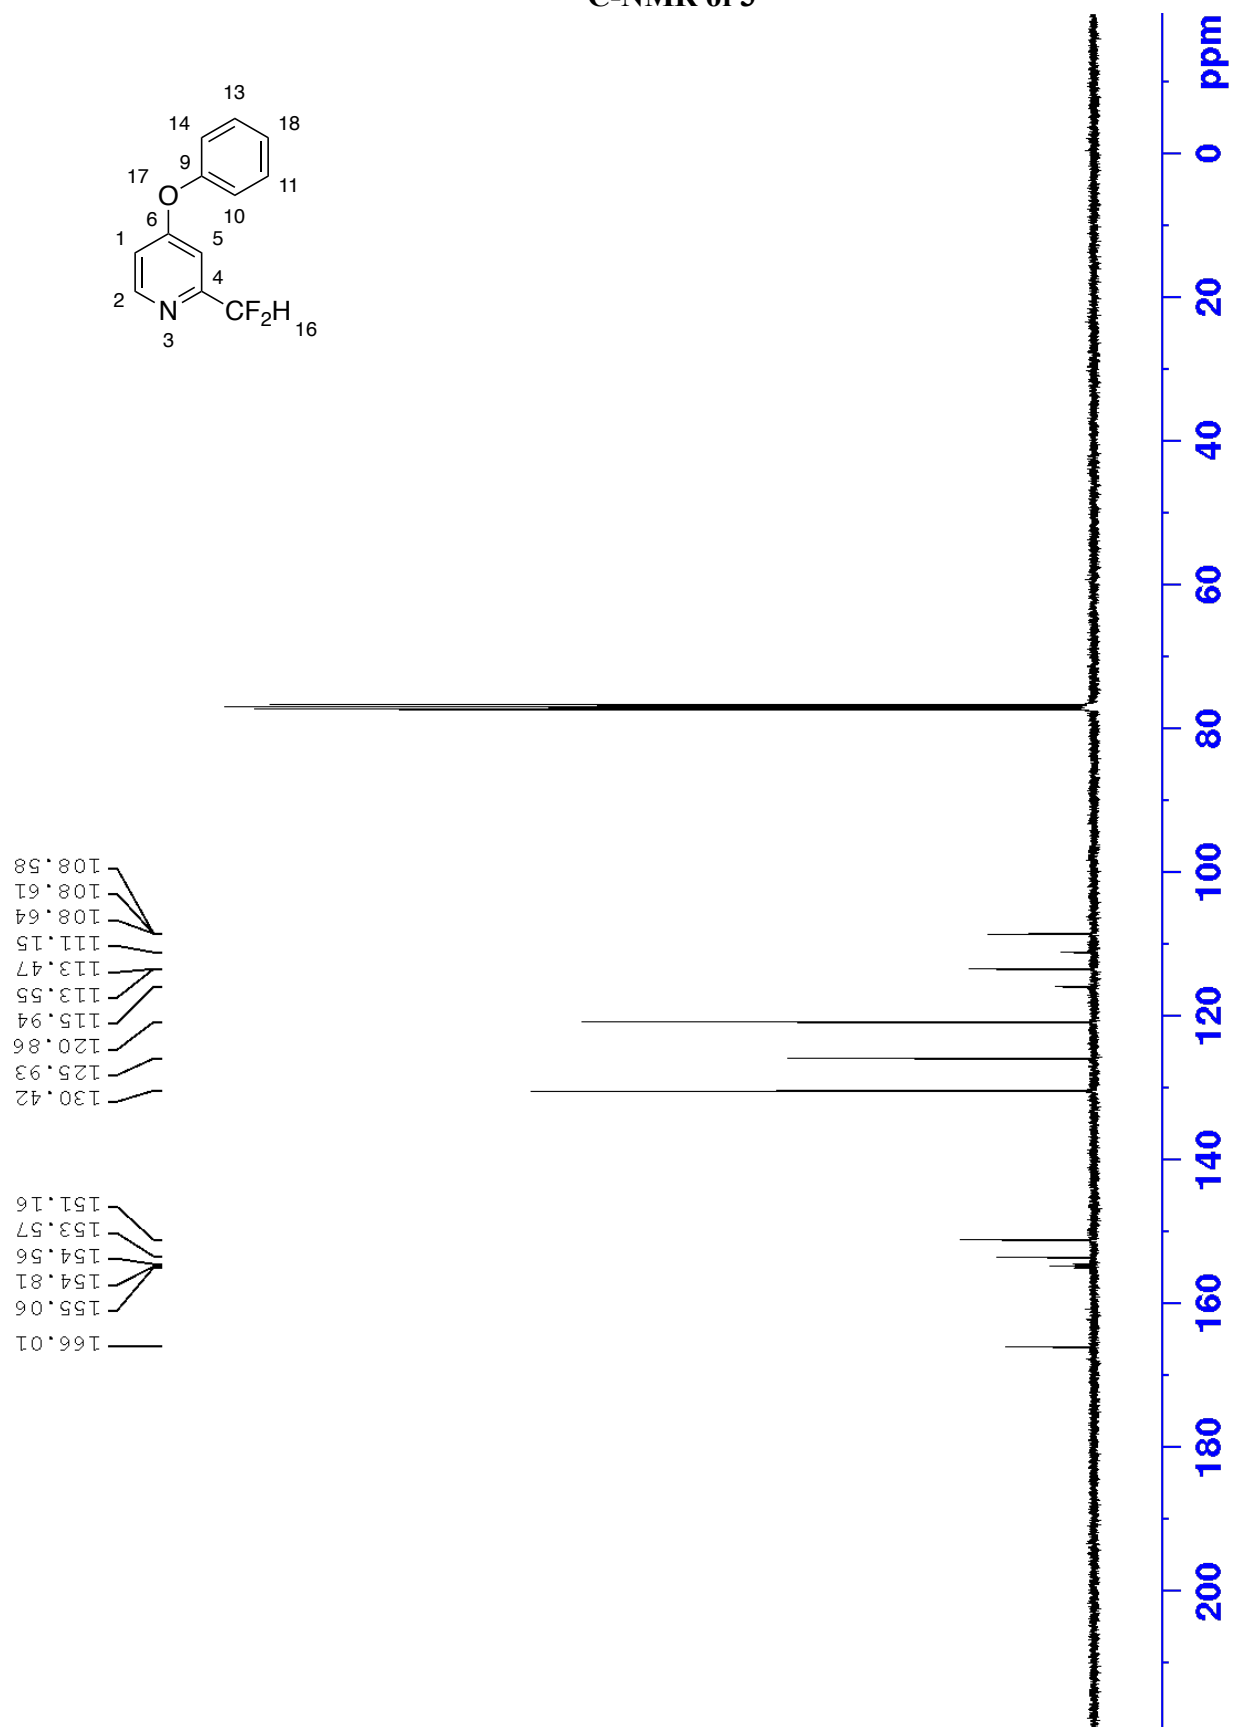

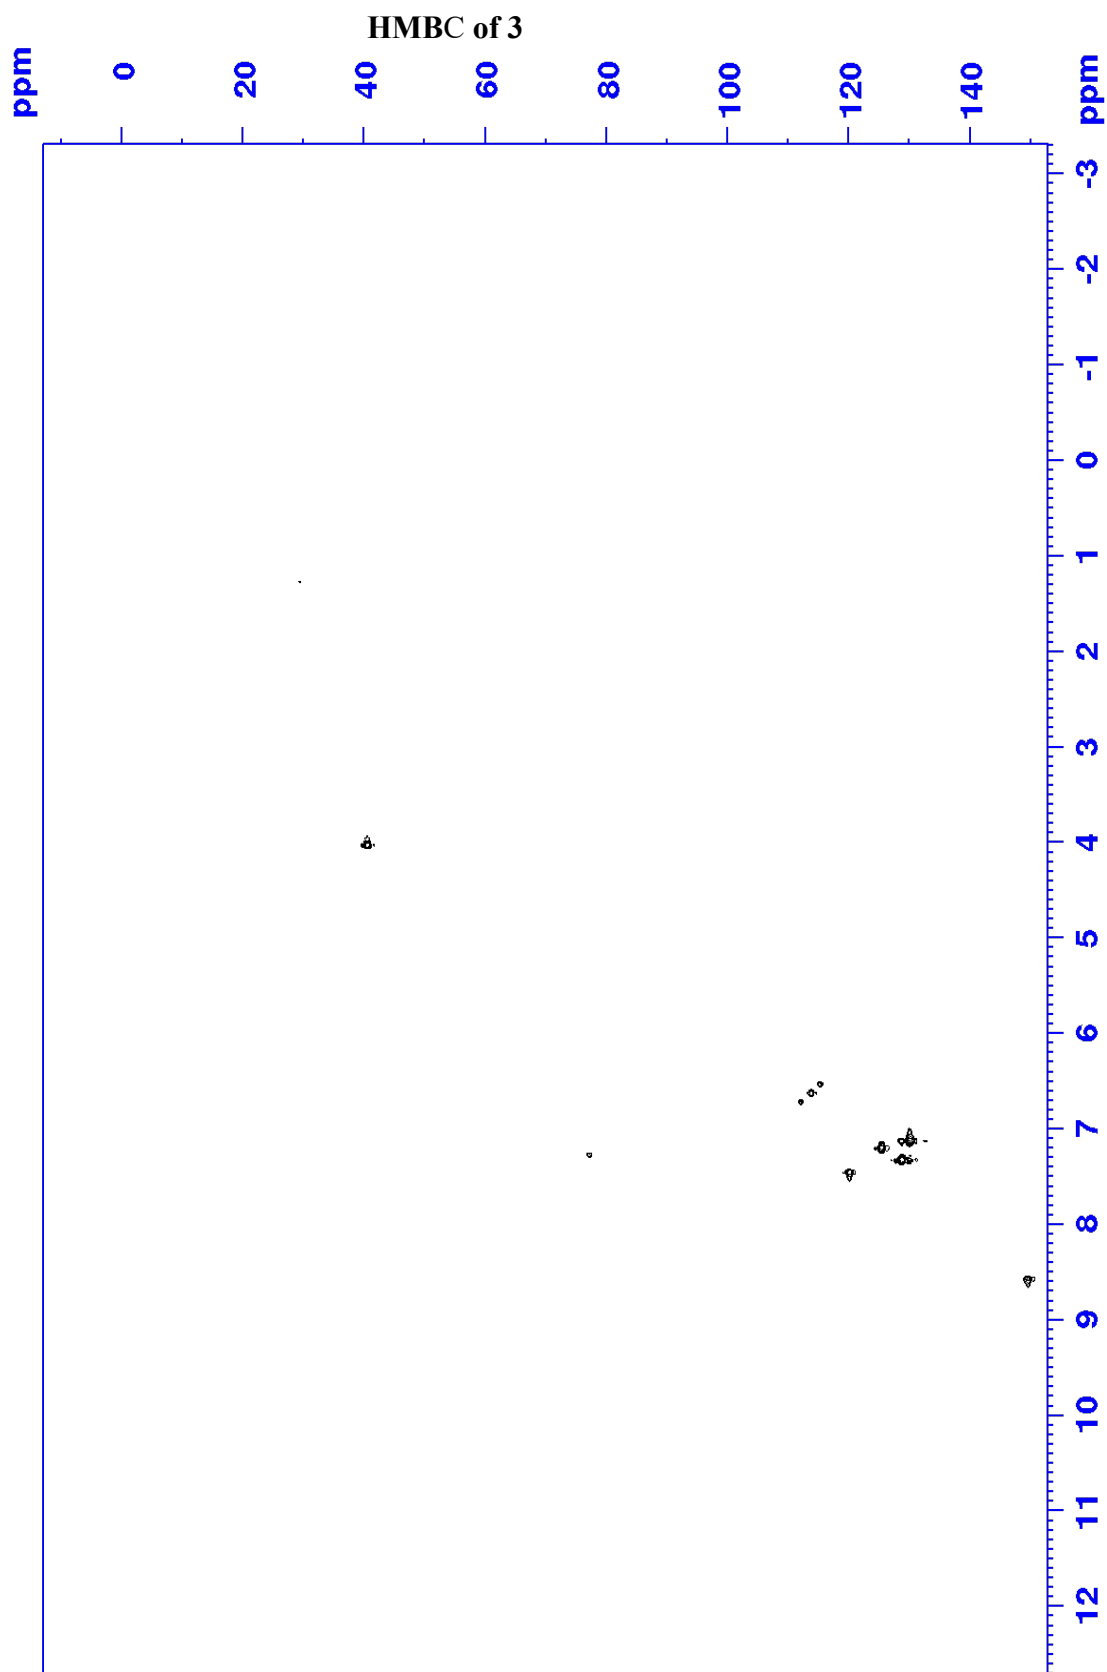



### Compound 4

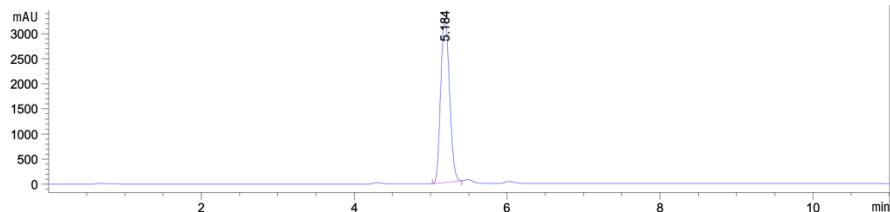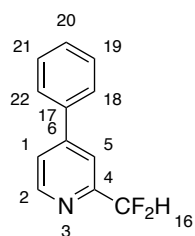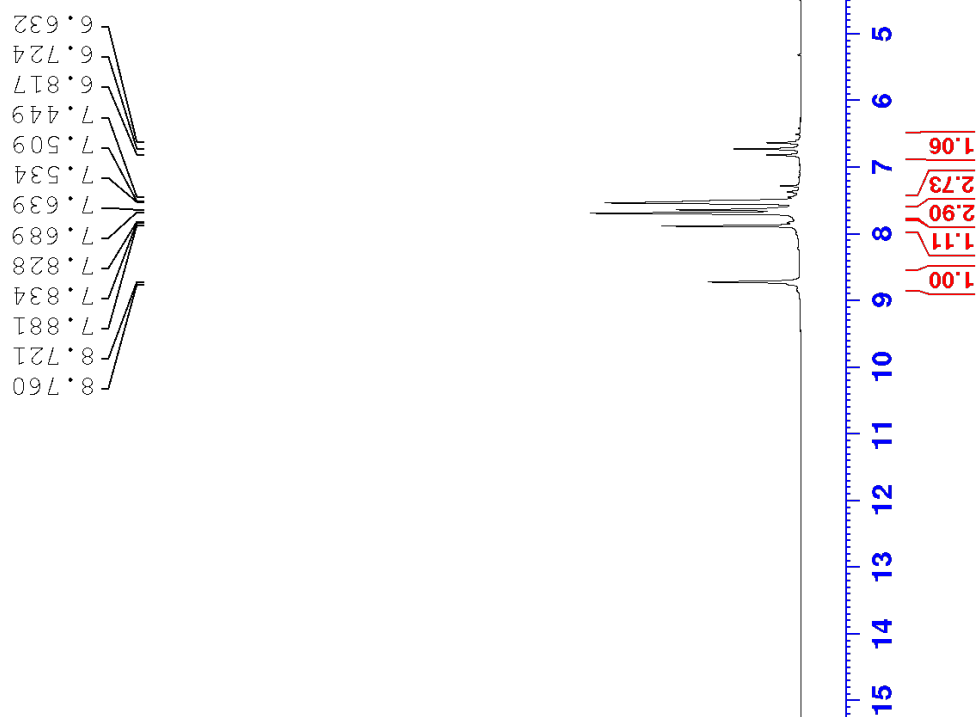

<sup>13</sup>C-NMR of 4

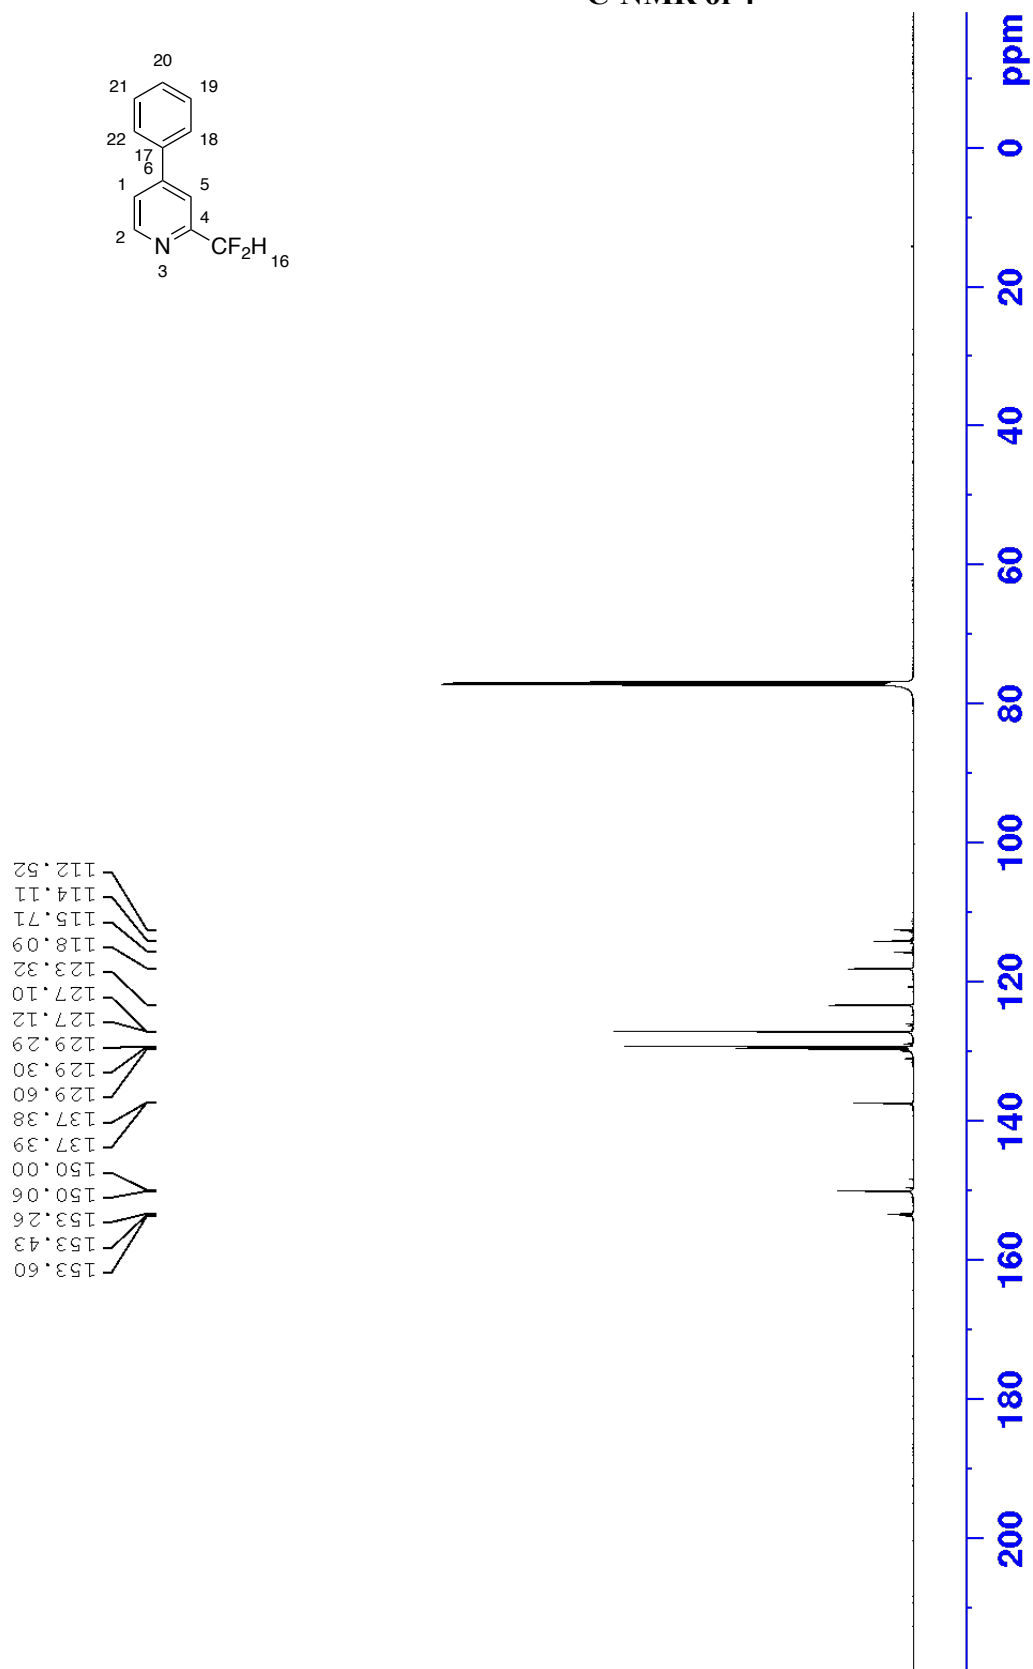

# Compound 5

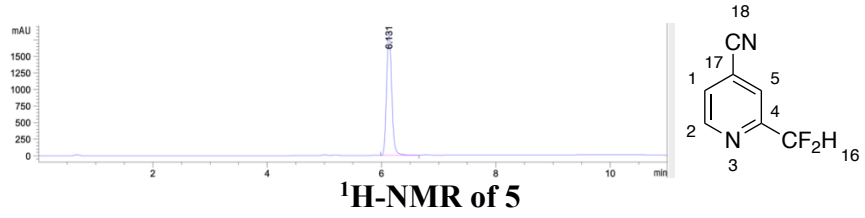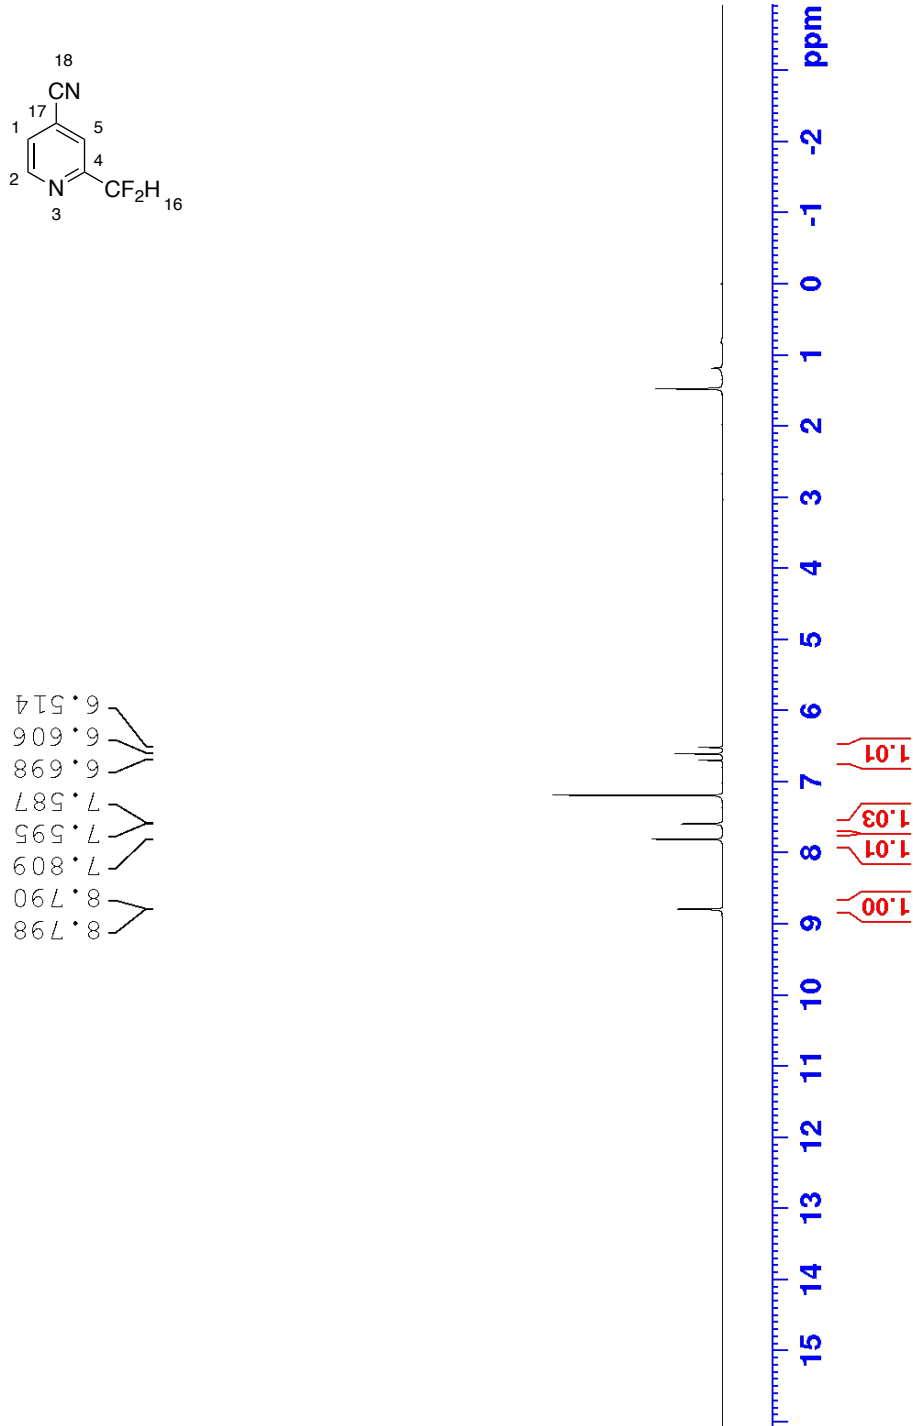

<sup>13</sup>C-NMR of 5

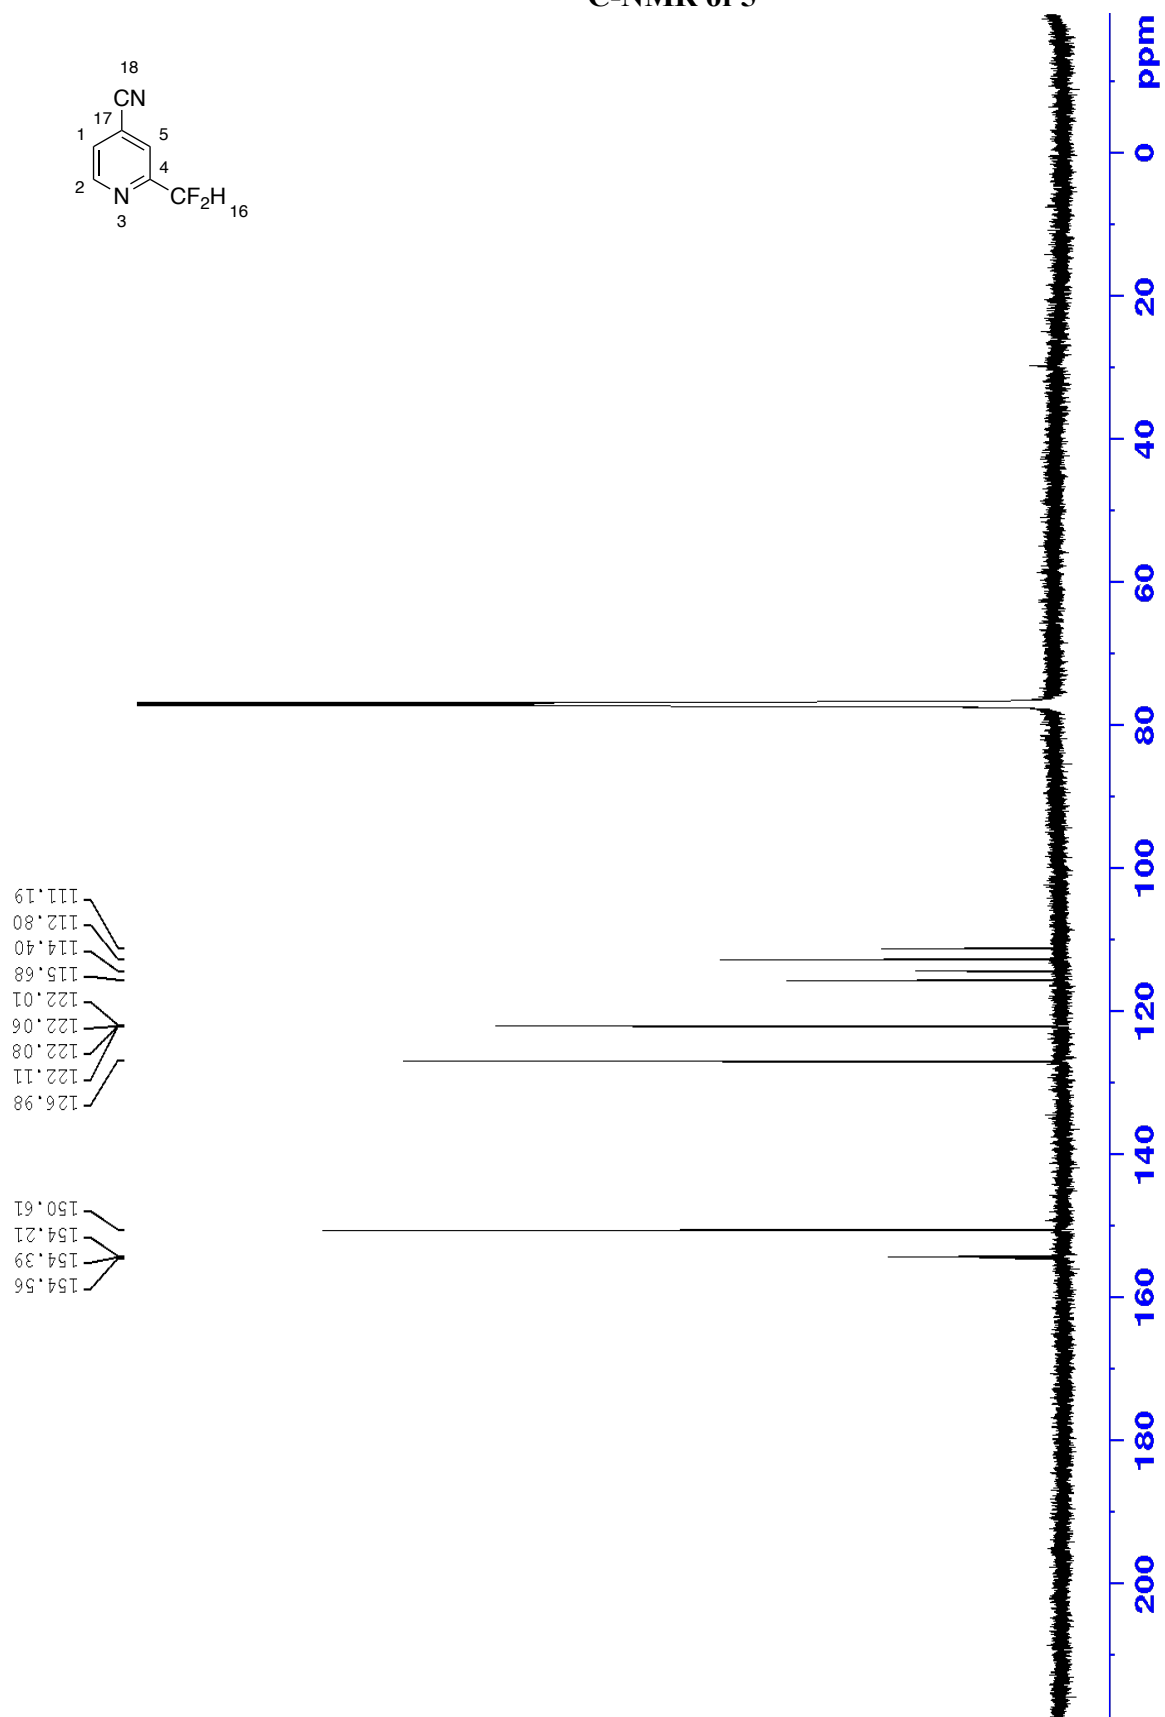

# Compound 6

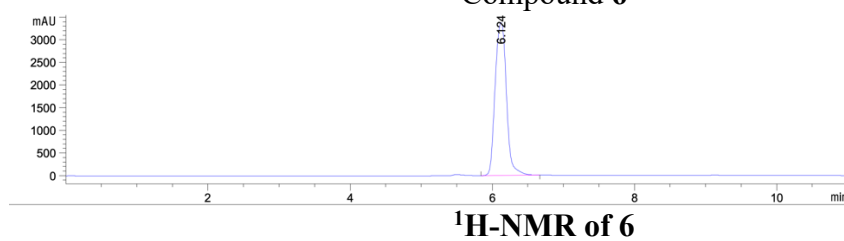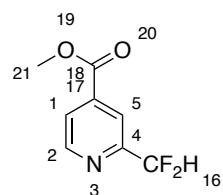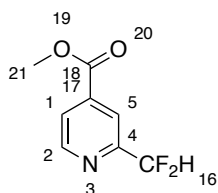

3.920

6.487  
6.625  
6.763  
7.891  
7.903  
8.113  
8.736  
8.749

## <sup>13</sup>C-NMR of 6

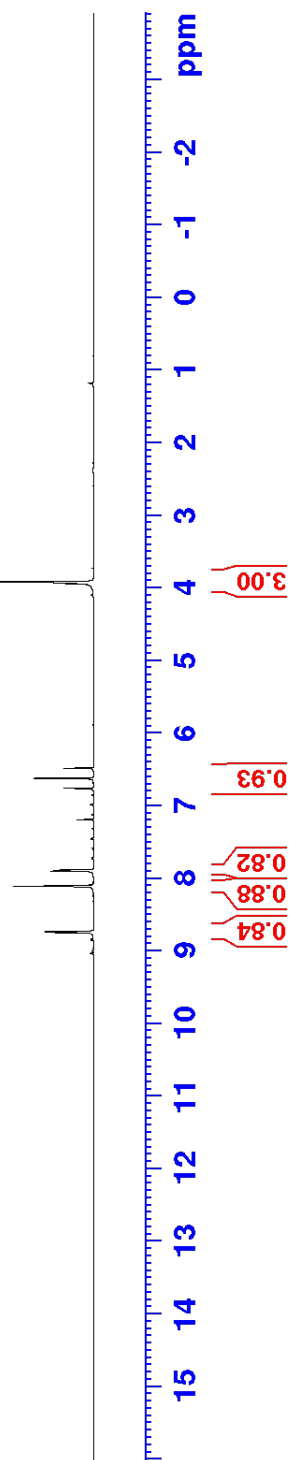

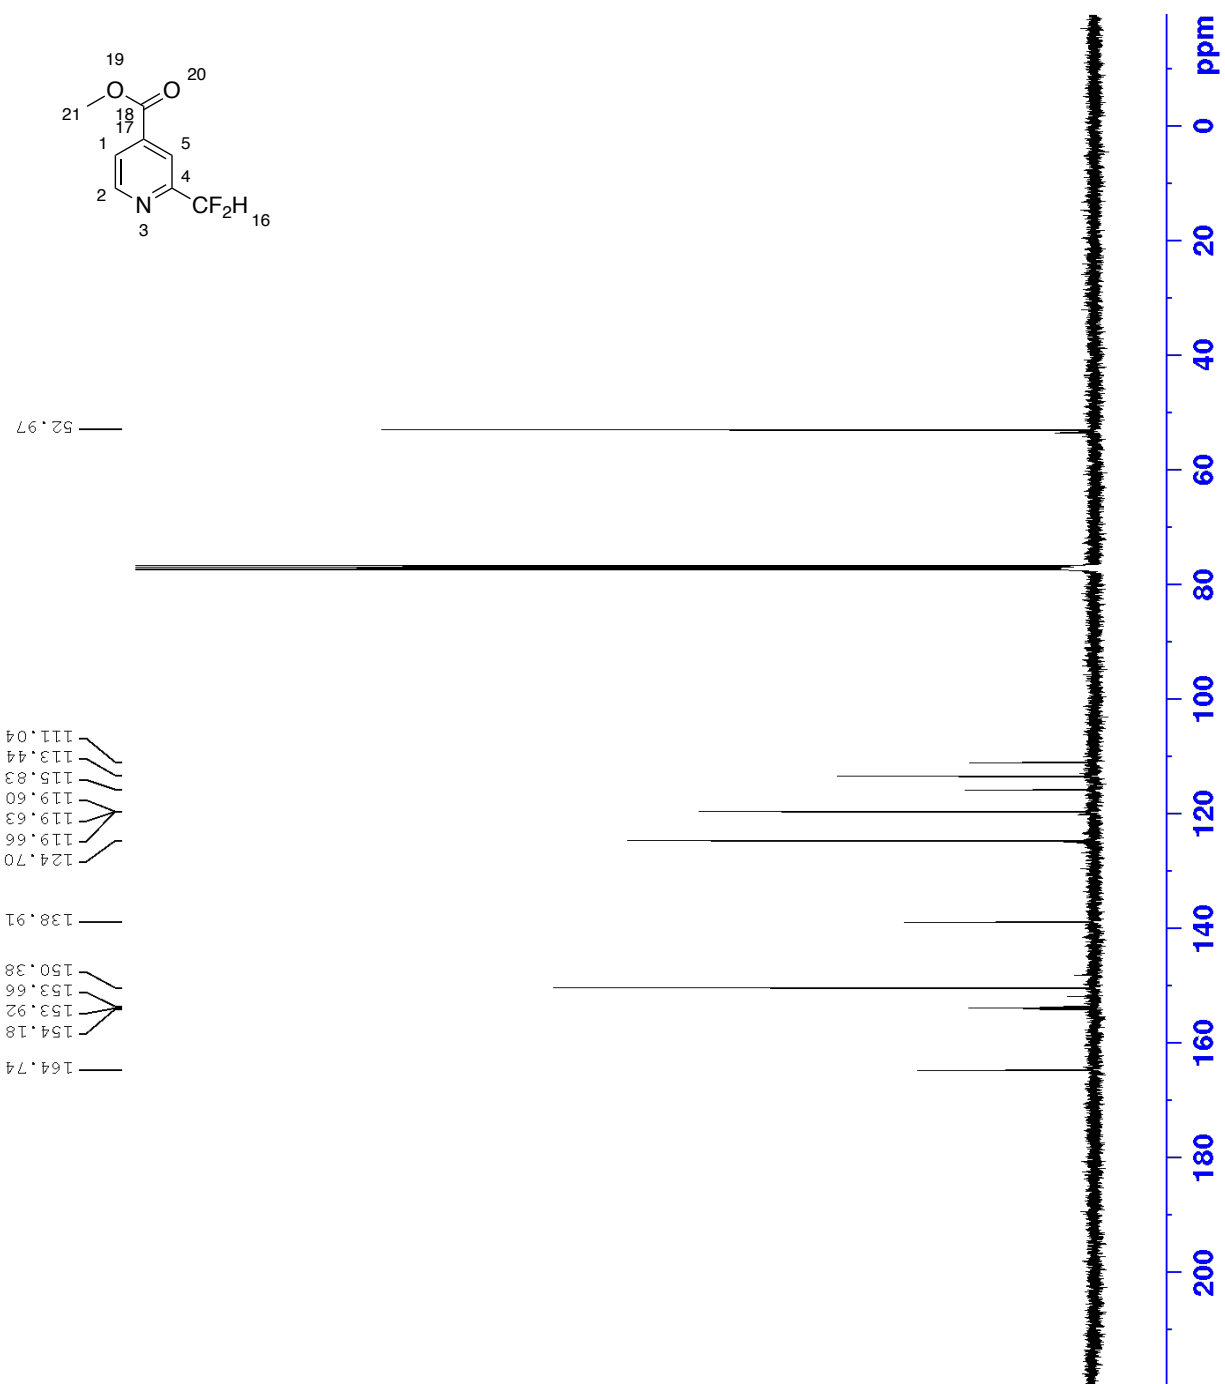

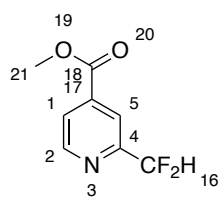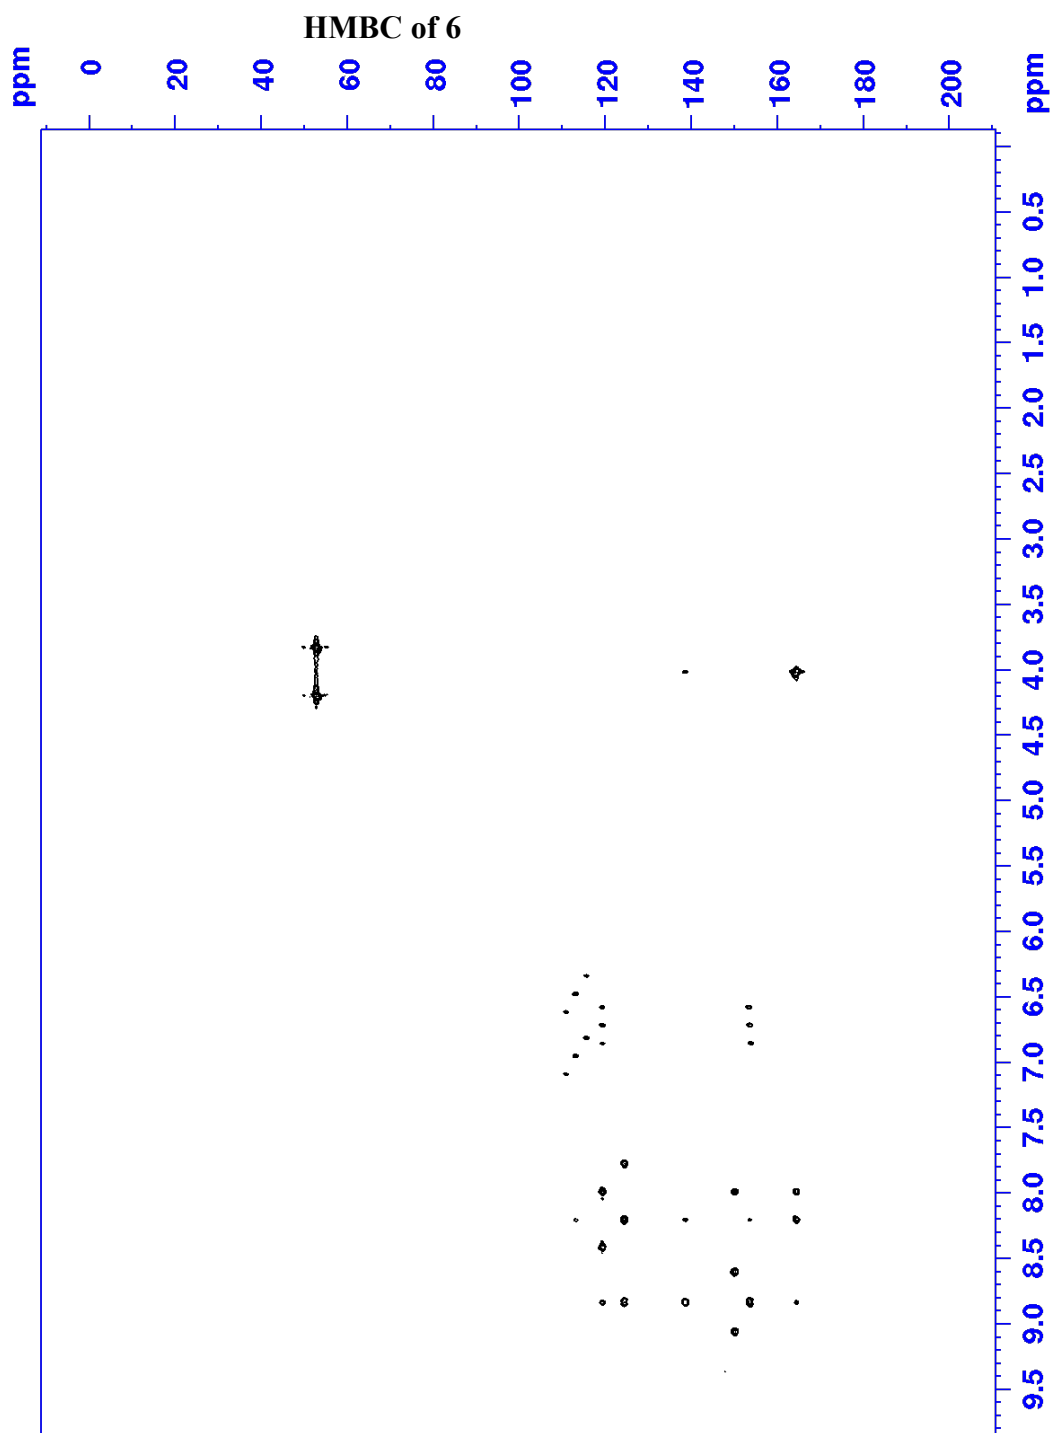

### Compound 7

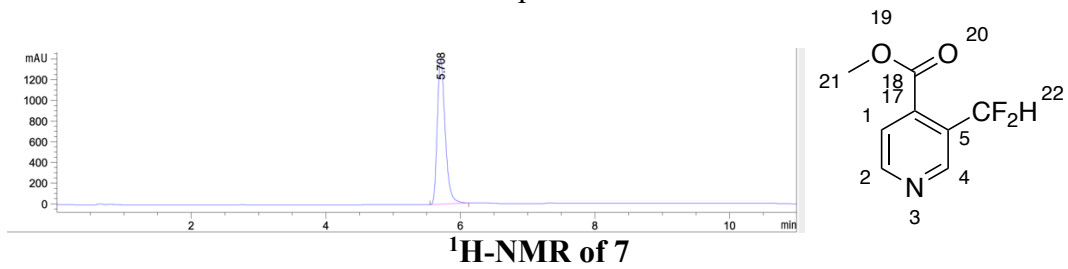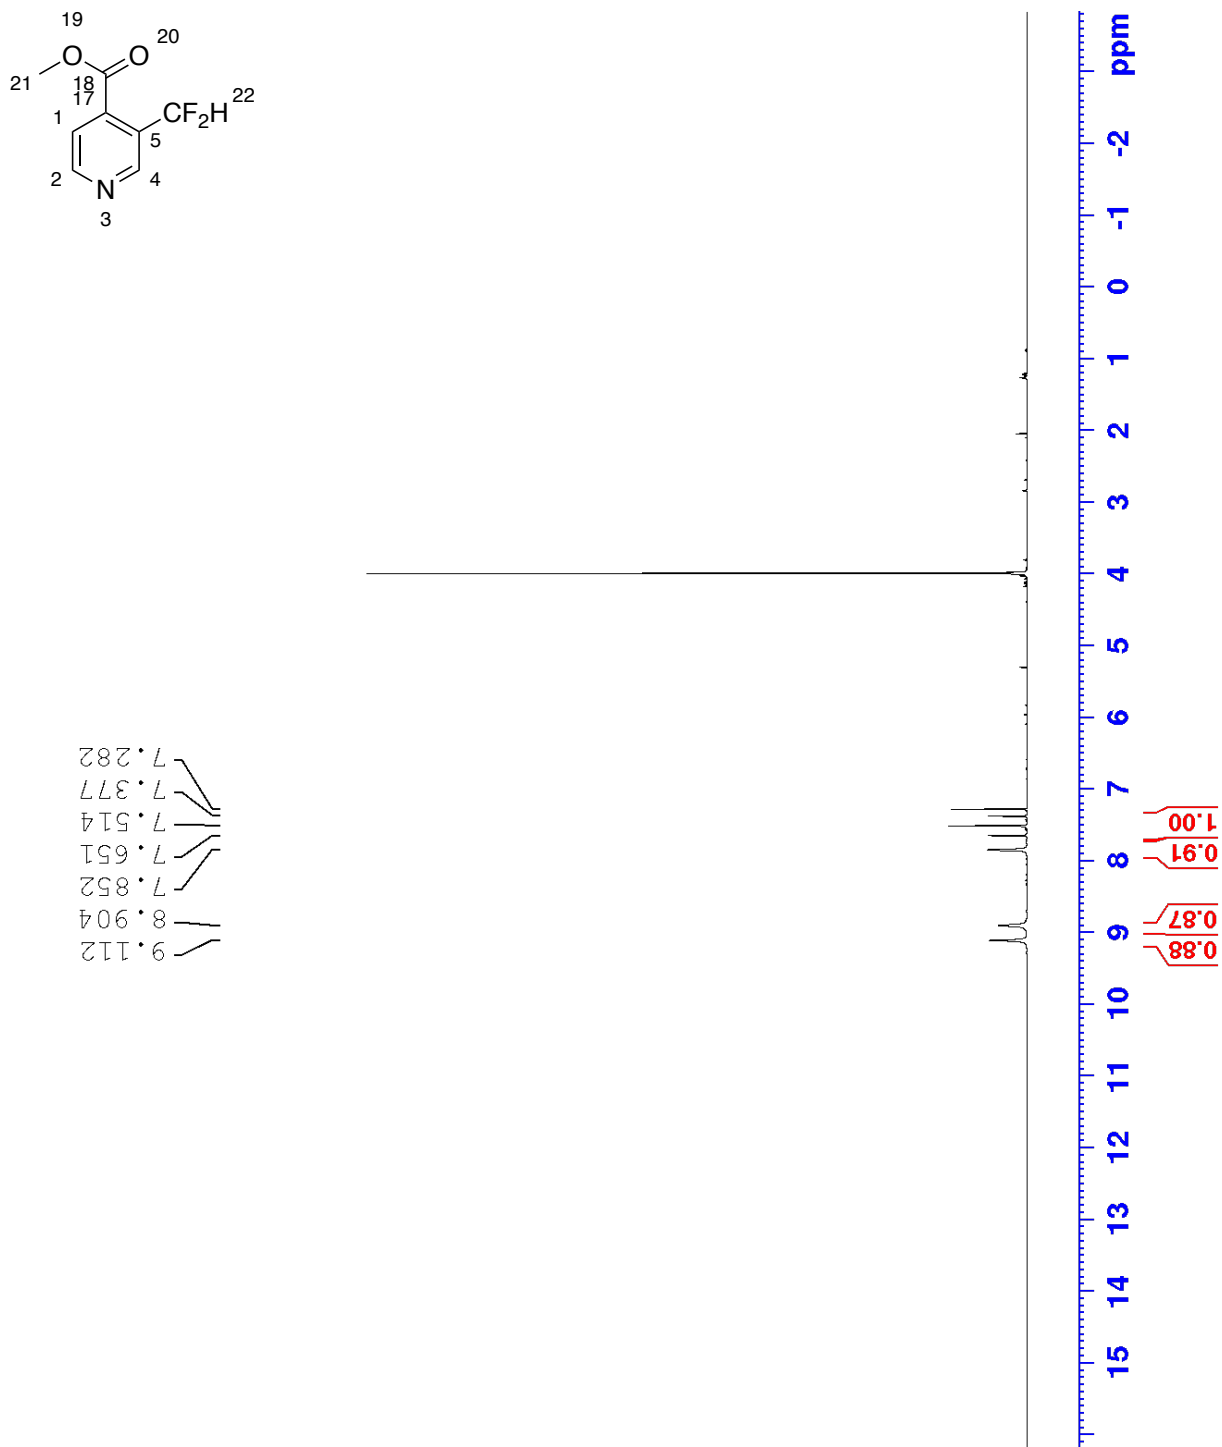



<sup>13</sup>C-NMR of 7

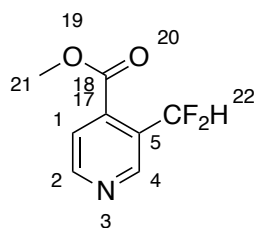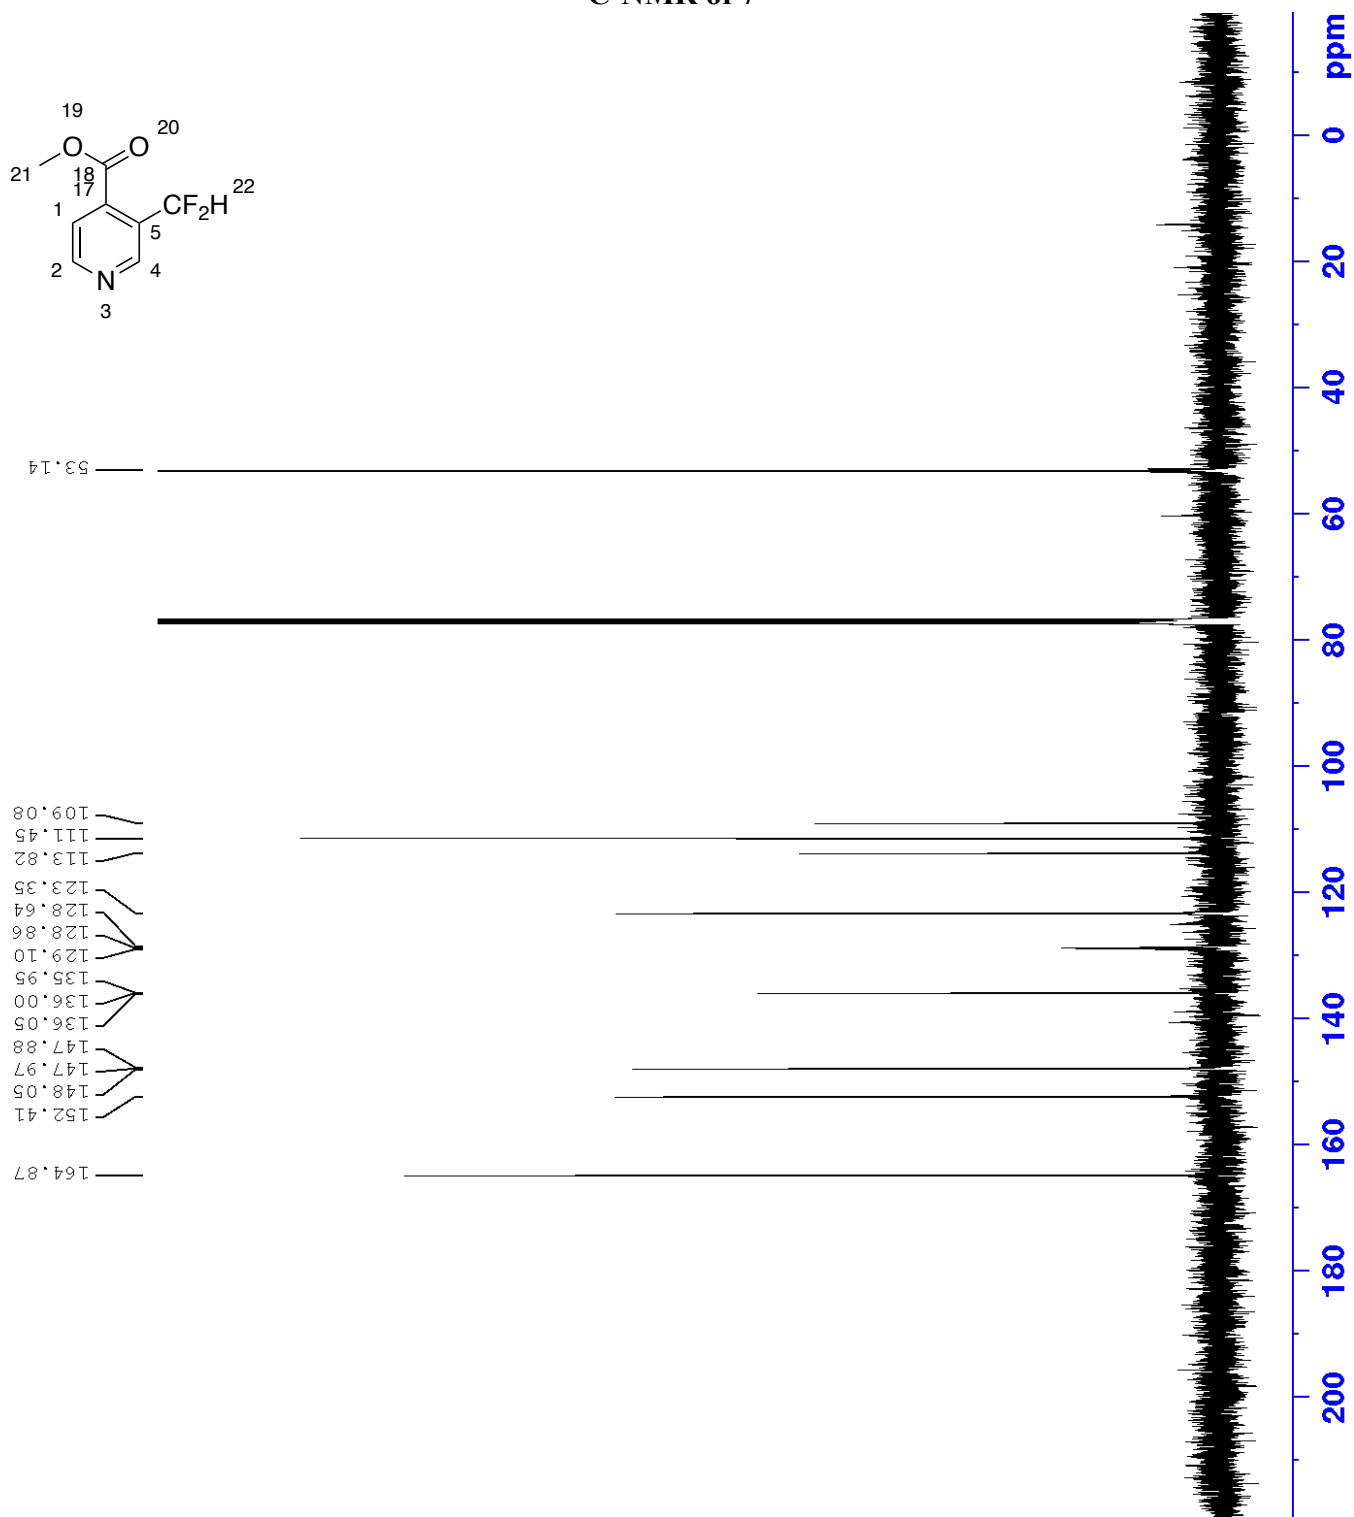

# Compound 11

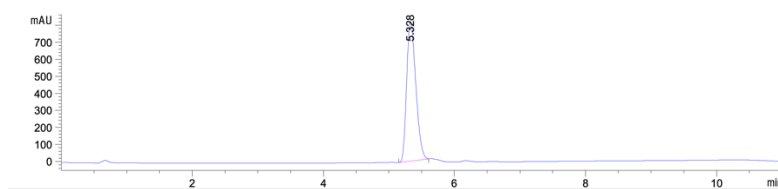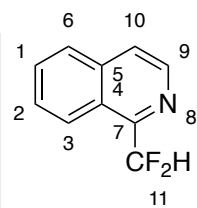

## <sup>1</sup>H-NMR of 11

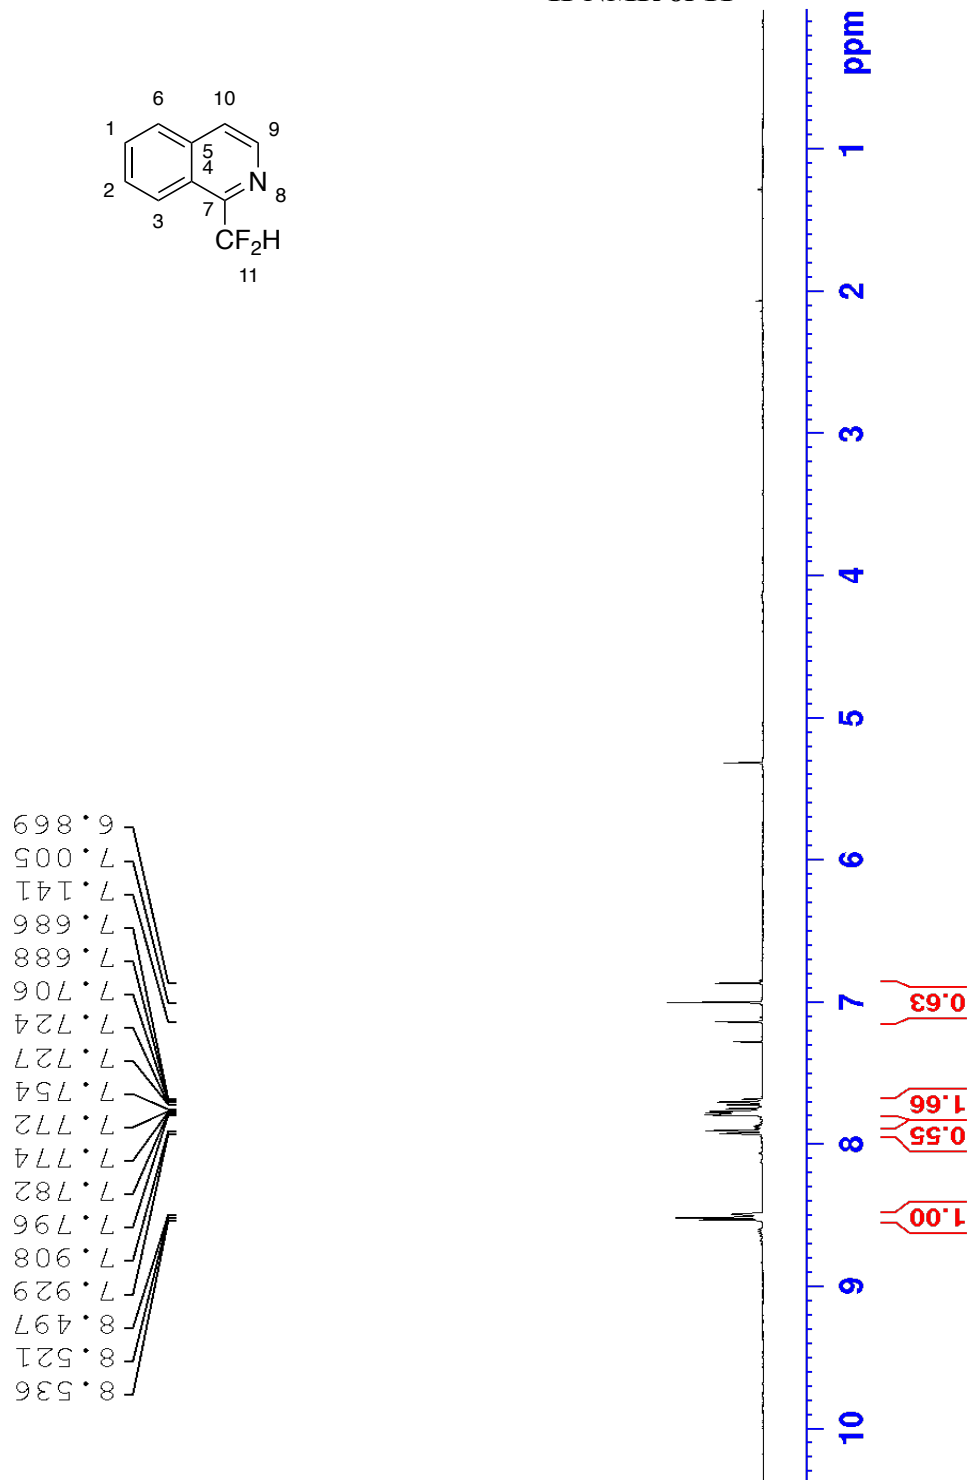

<sup>13</sup>C-NMR of 11

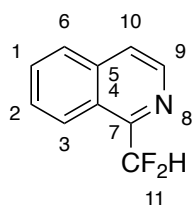

151.16  
141.01  
137.06  
130.73  
128.29  
127.31  
125.19  
123.57  
120.21  
117.80  
115.39

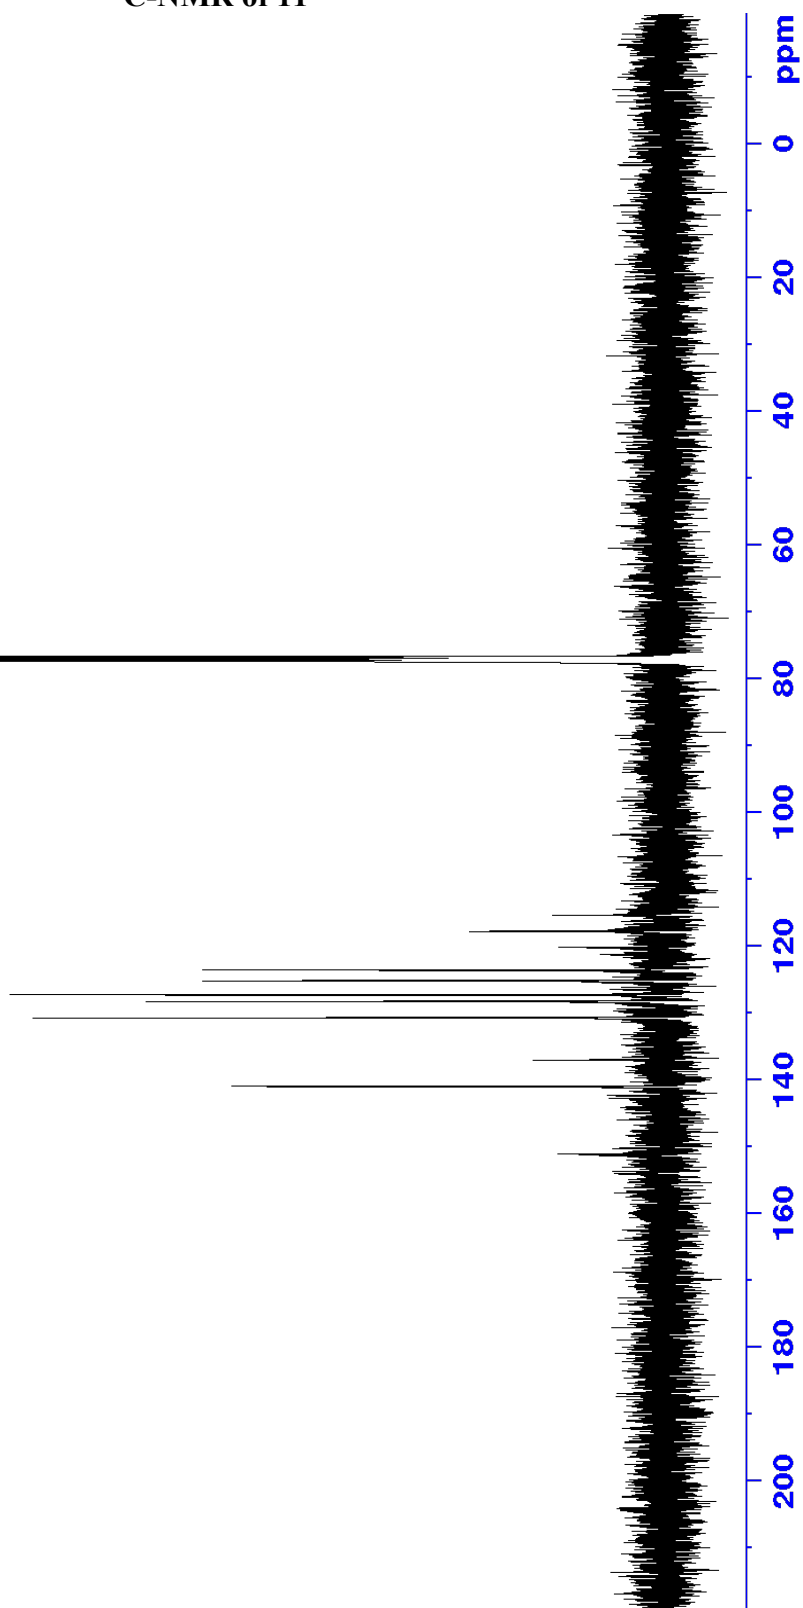

# Compound 12

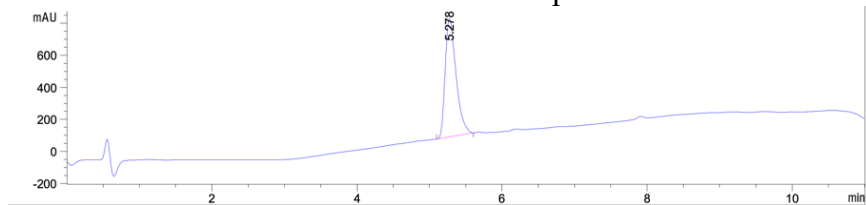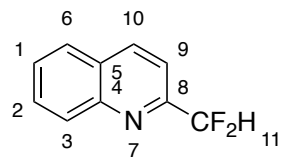

## <sup>1</sup>H-NMR of 12

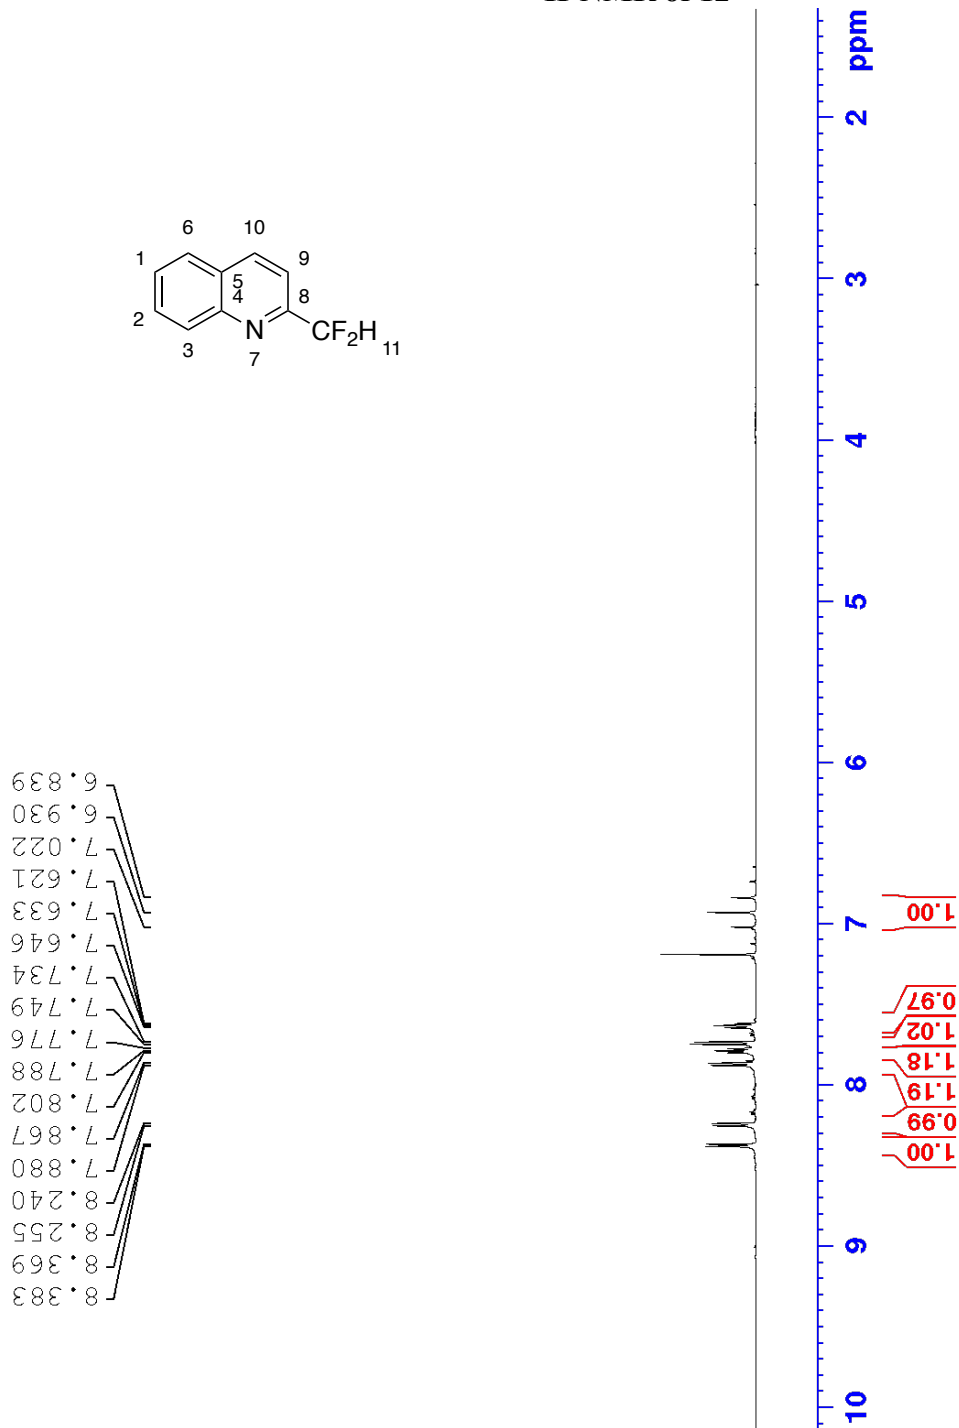

<sup>13</sup>C-NMR of 12

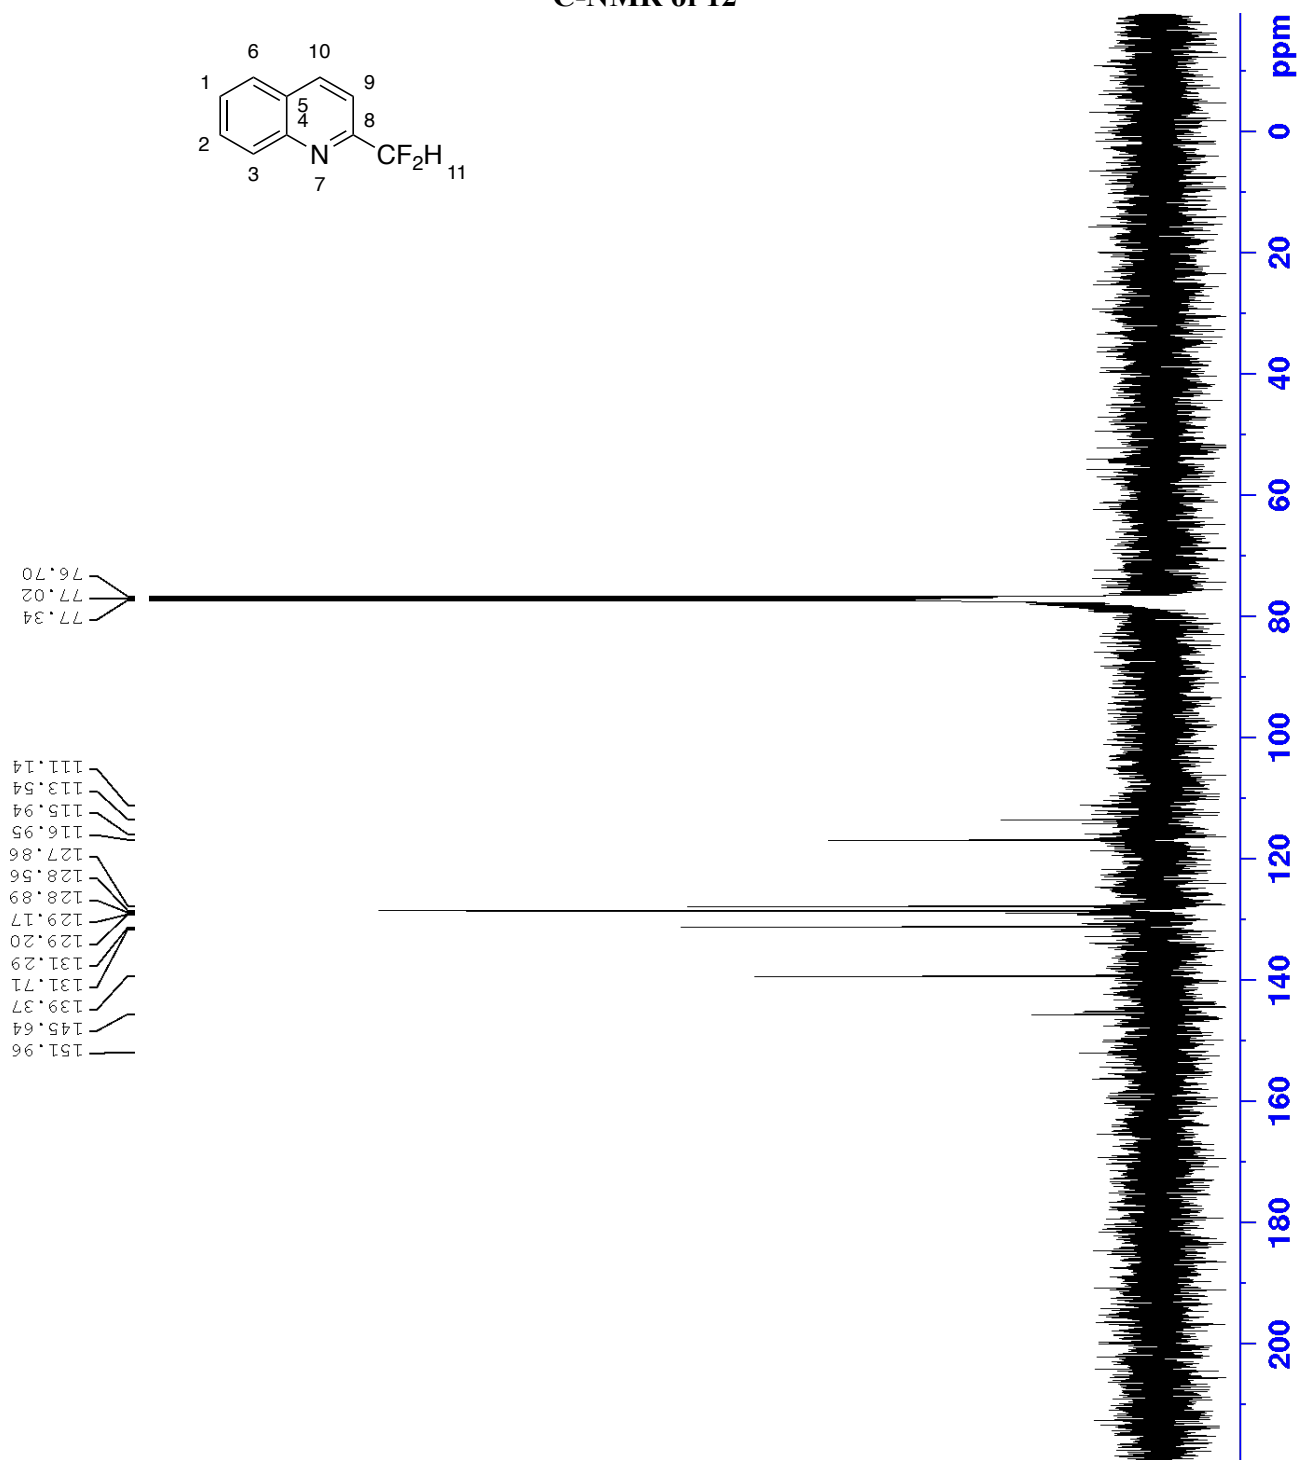

# HBMC of **12**

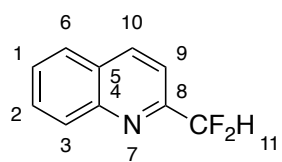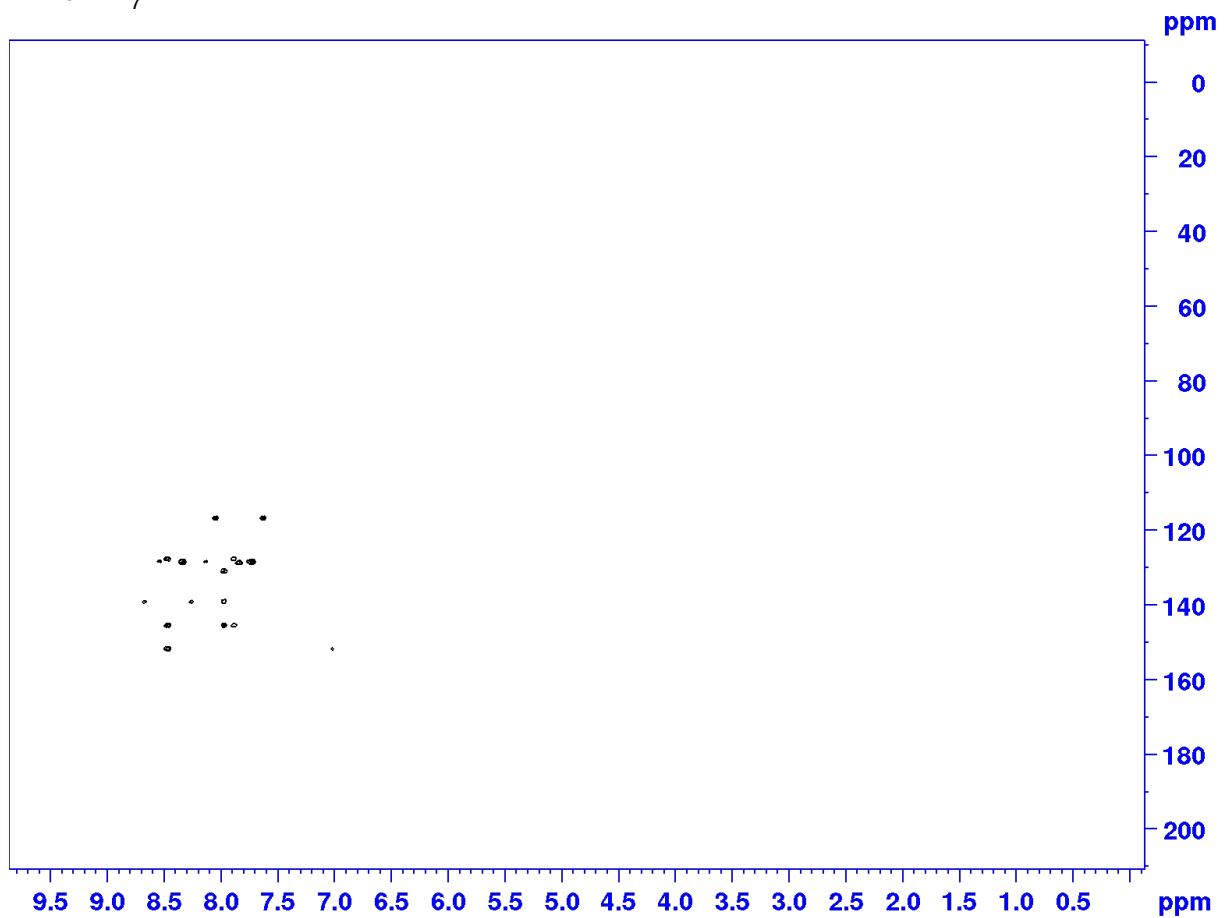

# HSQC of **12**

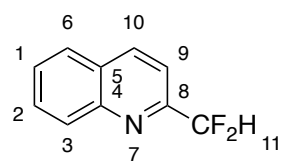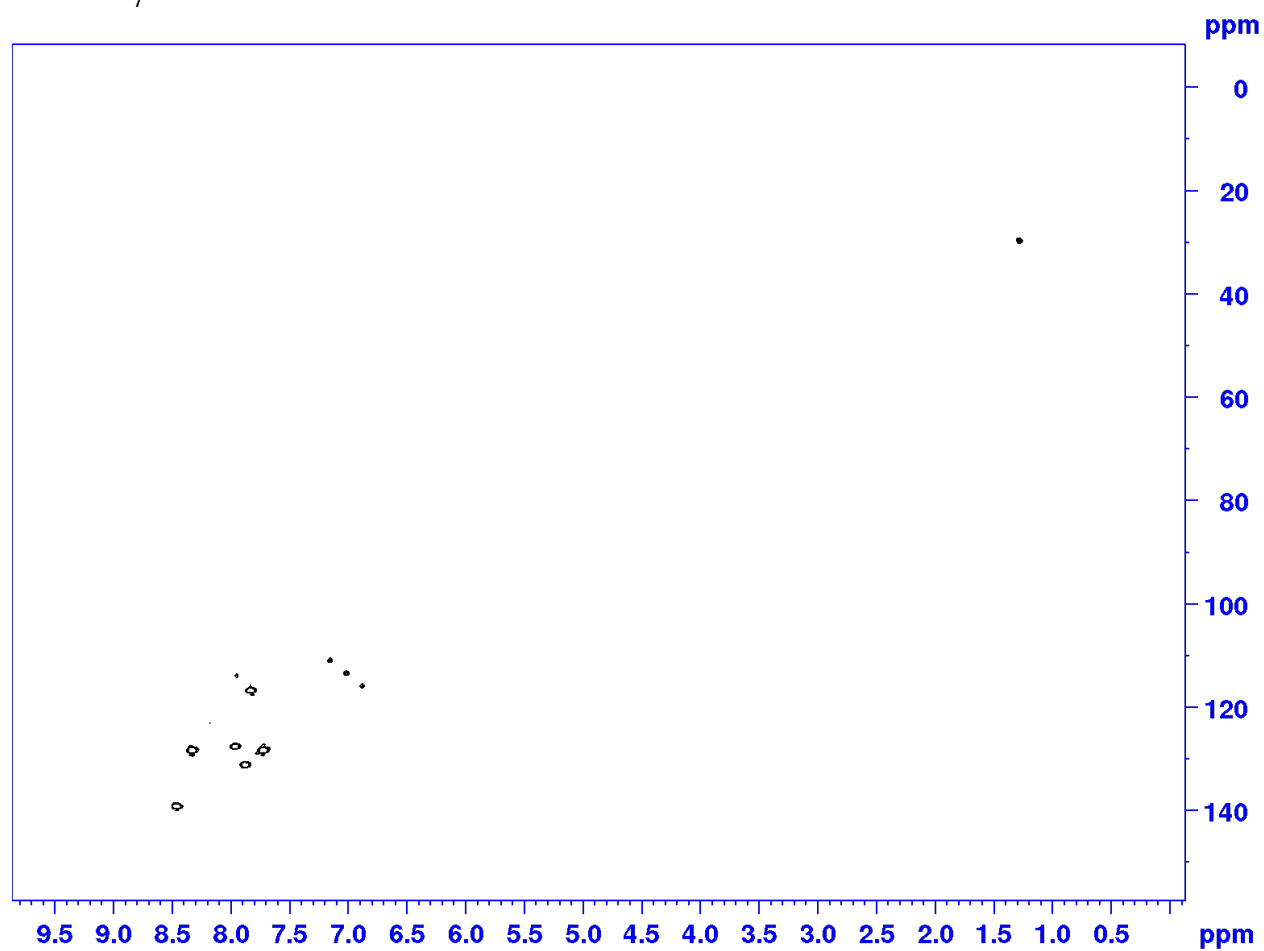

Supplement: d1md00245g1.pdf [file d1md00245g1.pdf]
